1 **Landscape genomic prediction for restoration of a**  
2 ***Eucalyptus* foundation species under climate change**

3 Megan A. Supple<sup>a,b,\*</sup>, Jason G. Bragg<sup>a,c</sup>, Linda M. Broadhurst<sup>d</sup>, Adrienne B. Nicotra<sup>a</sup>,  
4 Margaret Byrne<sup>e</sup>, Rose L. Andrew<sup>f</sup>, Abigail Widdup<sup>a</sup>, Nicola C. Aitken<sup>a</sup>, Justin O.  
5 Borevitz<sup>a,g</sup>

6 <sup>a</sup>Research School of Biology, The Australian National University, 134 Linnaeus Way,  
7 Canberra, ACT 2601, Australia; <sup>b</sup>Department of Ecology and Evolutionary Biology,  
8 University of California at Santa Cruz, 1156 High Street, Santa Cruz, CA 95064, USA;  
9 <sup>c</sup>National Herbarium of New South Wales, The Royal Botanic Gardens and Domain  
10 Trust, Mrs Macquaries Road, Sydney, NSW 2000, Australia; <sup>d</sup>Centre for Australian  
11 National Biodiversity Research, Commonwealth Scientific and Industrial Research  
12 Organisation (CSIRO) National Research Collections and Facilities, PO Box1600,  
13 Canberra, ACT 2601, Australia; <sup>e</sup>Science and Conservation Division, Department of  
14 Parks and Wildlife Western Australia, Locked Bag 104, Bentley Delivery Centre, WA,  
15 6983, Australia; <sup>f</sup>School of Environmental and Rural Science, University of New  
16 England, W55 Geology Rd, Armidale, NSW 2351, Australia; <sup>g</sup>Centre of Excellence in  
17 Plant Energy Biology, The Australian National University, 134 Linnaeus Way, Canberra,  
18 ACT 2601, Australia

19 \*corresponding author  
20 Megan Supple  
21 1156 High Street  
22 Mail Stop EEB  
23 Santa Cruz, CA 95064, USA  
24 [megan.a.supple@gmail.com](mailto:megan.a.supple@gmail.com)

25 **key words:** conservation genomics, phenotypic plasticity, landscape restoration

## 26 **Abstract**

27 As species face rapid environmental change, we can build resilient populations through  
28 restoration projects that incorporate predicted future climates into seed sourcing  
29 decisions. *Eucalyptus melliodora* is a foundation species of a critically endangered  
30 community in Australia that is a target for restoration. We examined patterns of  
31 genomic and phenotypic variation to make empirical based recommendations for seed  
32 sourcing. We examined isolation by distance and isolation by environment, determining  
33 gene flow up to 500 km and associations with environmental variables. Climate  
34 chamber studies revealed extensive phenotypic variation both within and among  
35 sampling sites, but no site-specific differentiation in phenotypic plasticity. Overall our  
36 results suggest that seed can be sourced broadly across the landscape, providing  
37 ample diversity for adaptation to environmental change. Application of our landscape  
38 genomic model to *E. melliodora* restoration projects can identify genomic variation  
39 suitable for predicted future climates, thereby increasing the long term probability of  
40 successful restoration.

## 41 **Introduction**

42 Species around the globe face rapidly changing environments, often in combination with  
43 habitat degradation and fragmentation. These factors are expected to have a negative  
44 impact on biodiversity (Lindenmayer et al., 2010). Three processes enable species  
45 survival in the face of altered conditions--migration, adaptation, and phenotypic plasticity  
46 (Aitken & Whitlock, 2013; Aitken et al., 2008; Hoffmann et al., 2015; Nicotra et al.,  
47 2010). An important conservation strategy is to assist these natural processes to help  
48 build more resilient communities. We can help species shift to regions with their  
49 preferred environmental conditions by assisting migration of gene pools across the  
50 landscape (Aitken & Whitlock, 2013; Aitken et al., 2008). We can aid populations to  
51 survive in situ by ensuring that sufficient genomic variation exists for adaptation to  
52 changing environments (Hoffmann et al., 2015). We can enable individuals to respond

53 to a greater range of environments by conserving existing phenotypic plasticity (Nicotra  
54 et al., 2010).

55           Seed sourcing during landscape restoration provides an ideal opportunity to  
56 apply scientific knowledge to enable these key processes and improve conservation  
57 outcomes (Broadhurst et al., 2008; Prober et al., 2015). For example, seed sources can  
58 be selected to restore historical patterns of gene flow across a fragmented landscape,  
59 incorporate high genomic diversity, and/or increase phenotypic plasticity. Seed sources  
60 can also be matched with current or projected future climates, enabling assisted  
61 migration to favorable environments (Aitken & Whitlock, 2013; Williams et al., 2014).

62           Historically, restoration often focused on geographically restricted local  
63 sources of seed under the premise that this would improve restoration outcomes by  
64 reducing the risk of maladaptation to local conditions and preventing outbreeding  
65 depression (Broadhurst et al., 2008). However, there are several potential drawbacks to  
66 this narrow local focus. In a fragmented system, narrow local seed sourcing reduces  
67 the number of potential source populations, thereby reducing the pool of available  
68 genetic material. This reduced gene pool may result in inbreeding depression in future  
69 generations, especially if combined with small population size (Broadhurst et al., 2008).  
70 Obtaining potential seed sources from a wider geographical area can increase genomic  
71 and phenotypic diversity, thereby increasing the ability of the species to survive in situ  
72 (Broadhurst et al., 2008). Additionally, the focus on maintaining local adaptation in situ  
73 assumes a static environment, not the rapidly changing environment that occurs today.  
74 As local conditions change, traits and genes that may have conferred an advantage in  
75 the past might not be suitable in the future environment. In recent year, climate  
76 adjusted provenancing has been proposed, which is a seed sourcing strategy that  
77 incorporates climate variability and focuses on sourcing seed that is predicted to be  
78 adapted to future climates (Byrne et al., 2013; Prober et al., 2015). This strategic  
79 assisted migration of variation across the landscape can aid in the establishment of  
80 populations that are more adaptable to future environments (Prober et al., 2015).

81           To determine the appropriate seed sourcing strategy and to identify optimal  
82 seed sources for a reforestation project, empirical knowledge of genomic variation for

83 the target species can provide valuable information. The technology now exists to  
84 assess genomic variation in any target species, enabling determination of patterns of  
85 Isolation By Distance (IBD) and Isolation By Environment (IBE). IBD is the association  
86 between genomic distance and geographic distance resulting from patterns of dispersal.  
87 IBE is the association between genomic distance and environmental distance, while  
88 controlling for geographic distance (Wang & Bradburd, 2014). Landscape genomic  
89 models can be generated by fitting geographic and environmental variables to the  
90 observed genomic diversity. These predictive models can optimize the genetic material  
91 selected for restoration and should improve long term outcomes (Hoffmann et al., 2015;  
92 Williams et al., 2014).

93 The extent of phenotypic plasticity in potential seed sources can be measured  
94 in growth assays of seedling traits across contrasting environmental conditions. The  
95 magnitude of the environmental response can be compared among maternal lines or  
96 populations and may identify populations that differ in their response to the  
97 environment. Such differing responses have been seen in some species of *Eucalyptus*  
98 (Andrew et al., 2010; Byrne et al., 2013; McLean et al., 2014).

99 *Eucalyptus melliodora* (A.Cunn. ex Schauer), commonly called yellow box, is  
100 an iconic Australian species that is the subject of extensive restoration efforts across its  
101 distribution. It is a foundation species of a critically endangered ecological community:  
102 the White Box–Yellow Box–Blakely’s Red Gum Grassy Woodland and Derived Native  
103 Grassland (Department of Environment and Climate Change and Water, 2011;  
104 Department of the Environment and Heritage, 2006; Threatened Species Scientific  
105 Committee, 2006). This woodland community exists in a fragmented landscape, with  
106 less than 5% of its original distribution remaining, mostly in small remnant patches  
107 (Department of Environment and Climate Change and Water, 2011; Department of the  
108 Environment and Heritage, 2006; Threatened Species Scientific Committee, 2006).  
109 Efforts to restore this endangered woodland community are ongoing and restoration  
110 practitioners are seeking scientific recommendations to improve seed sourcing. Climate  
111 change is an important consideration in seed sourcing decisions because species  
112 distribution modelling predicts that most eucalypts will need to shift their distributions

113 considerably in response (González-Orozco et al., 2016). In particular, for *E. melliodora*  
114 ecological niche modelling predicts that by 2090 the species distribution will shift toward  
115 the southeast and suitable areas will decrease by 77% as a result of environmental  
116 changes (Broadhurst et al., *in review*).

117 Here we survey genomic variation in 275 individuals from 37 sites across the  
118 present range of *E. melliodora*. We fit the genotypic data to geographic distance and  
119 key environmental variables at the site of origin. We find that effects of genomic  
120 isolation by distance begin at approximately 500km. This empirical estimate of "local" is  
121 much farther than what is often practiced for local provenancing. We also find that  
122 features of the abiotic environment can further explain genomic differentiation after  
123 accounting for geographic distance. We also examine seedling growth characteristics  
124 under simulated climate conditions and find significant variation in growth traits both  
125 within and among sites, but no significant variation in phenotypic plasticity across sites.  
126 Our landscape genomic model, which can empirically define local provenances and  
127 identify variation suitable for predicted future climates, can help build resilient  
128 populations through scientifically based restoration.

## 129 **Results**

### 130 **Genotyping by Sequencing**

131 We selected leaf material from 39 sites, sampling 3-10 trees per site (Supplemental  
132 Table S1). For each sample we Illumina sequenced a Genotyping by Sequencing  
133 (GBS) library (Elshire et al., 2011) and used a reference alignment-based approach to  
134 call genotypes. We conducted a preliminary analysis, based on 123,227 SNPs and  
135 removed 69 samples due to greater than 60% missing data. Visual examination of a  
136 cluster dendrogram of genomic distance between samples showed that technical  
137 replicates cluster closely together (Supplemental Fig. S1). A preliminary principal  
138 coordinate analysis (PCA) identified 19 samples that were strong genomic outliers  
139 (Supplemental Fig. S2), likely misidentified samples or recent hybrids. This result is

140 consistent with minor morphological differences noted in these samples, as well as  
141 previous microsatellite work (Broadhurst et al., *in review*). After removal of poor quality  
142 and geographic and genomic outlier samples, we reran the genotyping with the  
143 remaining 280 samples, resulting in 9,781 SNPs after filtering. A second preliminary  
144 PCA identified an additional 5 outlier samples that we considered sufficiently  
145 differentiated from the main *E. melliodora* cluster to merit removal for downstream  
146 analyses (Supplemental Fig. S3). We removed these samples and reran the missing  
147 data filter. The final data set included 275 samples from 37 sites (Fig. 1A), genotyped at  
148 9,378 physically distinct SNPs (>300 bp apart).

## 149 **Genomic Analyses**

150 A PCA of genomic distance among samples showed continuous variation with little  
151 suggestion of discrete population structure (Fig. 1B). The samples largely formed a  
152 single cluster, with the first PCA axis corresponding roughly to latitude. Outside of the  
153 main cluster, samples from the northernmost site separated out along the first PCA axis  
154 (y-axis) and a few samples from two other sites separated out along the second PCA  
155 axis (x-axis). Together, the first two PCA axes explained 3.0% of the genomic variation  
156 among individuals. The Mantel test estimated that the natural log of the geographic  
157 distance between samples explained 2.3% of the variation in individual genomic  
158 distance, indicating weak, but statistically significant, isolation by distance ( $p=0.0001$ ).  
159 We summarized genomic diversity between sampling sites using pairwise  $F_{st}$ . For all  
160 comparisons  $F_{st}$  was low (mean  $F_{st}=0.04$ ,  $sd=0.02$ ) (Supplemental Table S2). The  
161 maximum  $F_{st}=0.10$  occurs between sites 3 and 13, which are separated by over 1200  
162 km. Similar to the PCA of genomic distance among samples, the PCA of  $F_{st}$  between  
163 sampling sites corresponded roughly to latitude (Fig. 1C). In contrast, the first two axes  
164 of the PCA of  $F_{st}$  between sampling sites explained a higher percentage of variation  
165 (37.1%). These results highlight the tremendous amount of genomic variation within  
166 sampling sites, as well as the ability of thousands of independent genomic markers to  
167 distinguish between more distant sampling sites.

168 The site by site pairwise  $F_{st}$  matrix was used to test for geographic and  
169 environmental associations using generalized dissimilarity modelling (GDM) (Ferrier et  
170 al., 2007; Fitzpatrick & Keller, 2015; Thomassen et al., 2011). Of the 28 environmental  
171 variables considered for the model, we removed 12 variables because the single  
172 variable model explained less than 5% of the deviance (bioclimatic variables 2, 5, 6, 9,  
173 10, 14, 17, 19; elevation; water at depth; Prescott Index; and MrVBF). We removed an  
174 additional 9 variables due to high correlation and lower explanatory power than another  
175 remaining variable (bioclimatic variables 1, 4, 7, 12, 13, 15, 18; surface nitrogen; and  
176 surface phosphorus) (Supplemental Table S3). We ran permutation testing on a model  
177 with the remaining 7 variables and geography. This highlighted an additional 2 variables  
178 with low statistical significance and low explanatory power that we removed from the  
179 final model (surface water and bioclimatic variable 8). We also removed phosphorus at  
180 depth because, although it explained a substantial amount of genomic variation, the  
181 sampled sites were not well distributed across the range of values.

182 As a result, we included four environmental variables in the final model:  
183 isothermality (bioclim 3), mean temperature of the coldest quarter (bioclim 11),  
184 precipitation of the wettest quarter (bioclim 16), and total soil nitrogen at 100-200 cm  
185 (nitrogen at depth) (Supplemental Fig. S4). The GDM model with these four variables  
186 plus geographic distance explained 40% of the variation in sampling site genomic  
187 differentiation ( $F_{st}$ ). The GDM model showed a positive non-linear relationship between  
188 environmental distance and genomic distance (Supplemental Fig. S4A). To test the  
189 predictive power of the GDM model, we used a cross validation approach by generating  
190 1000 models with a random 30% of sampling sites removed. GDM proved satisfactory  
191 at predicting genomic differences between removed sites (cross validation correlation  
192 mean=0.73, standard deviation=0.12) (Supplemental Fig. S4B).

193 Of the four environmental variables, nitrogen at depth showed the strongest  
194 relationship with genomic distance, with changes in genomic distance predicted across  
195 the range of nitrogen values (Supplemental Fig. S4C). Mean temperature of the coldest  
196 quarter was the second strongest predictor, showing a similar pattern as nitrogen  
197 (Supplemental Fig. S4D). Precipitation of the wettest quarter was the third strongest



198 environmental predictor, predicting the largest change in genomic distance between 250  
199 and 400 mm (Supplemental Fig. S4E). Isothermality (mean diurnal range divided by  
200 annual temperature range) was the final predictor, predicting the most change in  
201 genomic distance at higher values (Supplemental Fig. S4F).

202           Geographic distance showed a non-linear relationship with genomic distance.  
203 The geographic spline predicted no genomic differentiation until close to 500 km, at  
204 which point an increase in geographic distance predicted an increase in genomic  
205 distance (Fig. 2). Randomly subsampling sites showed that the predicted genomic  
206 distance for large geographic distances was quite variable, but for sites less than 500  
207 km apart, all iterations consistently predicted little genomic differentiation between sites  
208 (Supplemental Fig. S4H).

209           To project the final GDM model onto the current environmental landscape, we  
210 first delineated the geographic extent of the analysis by defining an *E. melliodora*  
211 distribution polygon. We then projected the GDM model onto this region using the  
212 current values of the environmental variables across the landscape. This analysis  
213 partitioned the landscape into a number of regions with different predicted genomic  
214 compositions, including northern coastal, northern inland, and southern regions (Fig.  
215 3A). While the biggest differences occurred in regions with few sampling sites, there is  
216 a distinction between the northern and southern sites, as well as between sites on  
217 opposite sides of the Great Dividing Range in the southern region (e.g. site G versus  
218 site A, Fig. 3A). These projections highlight where environmental filtering of genotypes  
219 may have occurred due to different selective pressures.

220           We compared the GDM model projected onto current conditions to the GDM  
221 model projected onto 2070 climate predictions. This analysis scored each position  
222 across the landscape based on how much genomic change was predicted to occur in  
223 response to changing environmental conditions (Fig. 3B). For the middle north region  
224 (around sites K2 and 14) and the southern areas towards the coast, the models  
225 predicted more intense natural selection in response to climate change. Thus, these  
226 areas could be prioritized for assisted migration.



227 We also used the GDM model to compare the genomic composition under  
228 future environmental conditions at a single location to the genomic composition under  
229 current climate conditions across the landscape. This comparison is useful for  
230 identifying optimal seed sources for restoration sites given climate change scenarios.  
231 We demonstrated this utility by selecting two hypothetical reforestation sites and  
232 identifying distinct regions that would provide favorable seed sources for each site (Fig.  
233 4). The analysis for the southern reforestation site identified a large portion of the  
234 southern distribution, centered at the reforestation site. For this site it appears that the  
235 selected areas are largely driven by the pattern of isolation by distance, in particular the  
236 lack of genetic differentiation for long geographical distances. The analysis for the  
237 northern reforestation site identified a more limited range of areas across the landscape,  
238 possibly driven in part by a decreased power due to lower sampling intensity in the  
239 north. In addition to identifying a narrow region in the north that is centered on the  
240 reforestation site, a number of more distant areas along the coast were also identified,  
241 indicating these selected areas are driven more by patterns of isolation by environment  
242 than isolation by distance.

243 These genomic analyses suggest that for woodland restoration a  
244 geographically wider and environmental model based approach to seed sourcing would  
245 allow incorporation of more genetic diversity and enable better matching of the selected  
246 genotypes to current and predicted future environmental conditions at the reforestation  
247 site.

## 248 **Growth Experiments**

249 We conducted a climate controlled growth experiment to measure variation in seedling  
250 growth traits among sampling sites and assay phenotypic plasticity. We grew seedlings  
251 from six sites, with six maternal lines per site, at two different climate regimes (average  
252 summer conditions and 5°C hotter summer conditions). For analysis of seedling height  
253 and total leaf length, we analyzed a total of 291 seedlings (from 32 maternal lines  
254 representing six sampling sites) that were determined to be well established at the five  
255 week measurement. For analysis of the relative height increment, we analyzed a total

256 of 560 seedlings (from all 36 maternal lines) for which we were able to calculate this metric.  
257 There were four seedlings that were outliers for the relative growth increment ( $>0.035$ ).  
258 These outliers had little effect on the results of the linear models, so we included them  
259 in the final analysis.

260 The models for all three response variables (seedling height, total leaf length,  
261 and relative height increment) showed that all fixed effects (sampling site, maternal line  
262 nested within sampling site, and experimental condition) were statistically significant at  
263 the  $p=0.05$  level (Supplemental Table S4). Experimental condition explained a small  
264 percentage of the variation (1.2-8.1%), as did sampling site (1.8-17.7%) (Supplemental  
265 Fig. S5). Maternal line tended to explain a larger amount of variation (10.6-27.6%).  
266 However, most of the variation remained unexplained (56.6-71.5%). None of the three  
267 response variables showed significant variation in phenotypic plasticity across sites (all  
268 maternal line/sampling site by experimental condition interactions  $p>0.50$ )  
269 (Supplemental Fig. S6 and Table S5).

270 We then conducted an outdoor drought experiment using a subset of  
271 seedlings from the temperature experiment. We analyzed 146 seedlings representing  
272 20 maternal lines from five sampling sites. These seedlings were grouped into 73 pairs,  
273 with one of each pair assigned to each treatment—well watered versus drought. We  
274 analyzed variation in four response variables: stomatal conductance, leaf length to width  
275 ratio, relative chlorophyll content (SPAD index), and specific leaf area (SLA, leaf area  
276 divided by dry mass).

277 The droughted seedlings had significantly lower stomatal conductance rates  
278 than the well watered ones, indicating that the seedlings were stressed ( $p<0.00001$ )  
279 (Supplemental Table S6). Treatment explained most of the variation in stomatal  
280 conductance (62.3%), while maternal line and sampling site explained only a small  
281 amount of variation (5.8% and 0.9% respectively) (Supplemental Fig. S7). For the  
282 remaining three response variables (leaf length to width ratio, SPAD, and SLA), much of  
283 the variation was unexplained (40.5%-70%). Experimental condition was not  
284 statistically significant and explained little to no variation (0.0-4.4%) (Supplemental Fig.  
285 S7 and Table S6). Sampling site and maternal line were statistically significant in the

286 linear models at the  $p=0.05$  level and explained some variation (6.7-21.2%)  
287 (Supplemental Fig. S7 and Table S6). Smaller, thicker leaves, and thus lower SLA  
288 values, were expected for droughted seedlings and for seedlings grown from seed  
289 collected from drier areas. Consistent with this expectation, the seedlings subjected to  
290 drought conditions showed lower SLA values. However, seedlings from drier sampling  
291 sites (D and T3) showed higher SLA values than more mesic sites (B, G, and 11),  
292 contrary to expectation (Supplemental Fig. S7). None of the four response variables  
293 showed significant variation in phenotypic plasticity across sites (all maternal  
294 line/sampling site by experimental condition interactions  $p>0.13$ ) (Supplemental Fig. S8  
295 and Table S7).

296 In addition to measuring seedling growth traits, we also examined the shape  
297 of the leaves from the drought experiment seedlings. We noted substantial variation in  
298 leaf shape, both among sites and within (Supplemental Fig. S9). The remarkable  
299 amount of phenotypic variation in the seedlings is consistent with the high levels of  
300 genomic variation measured both among sites and within sites.

## 301 Discussion

302 *Eucalyptus melliodora* is a foundation species in a critically endangered woodland  
303 community that now occupies a fraction of its former distribution and is the subject of  
304 restoration projects across its native range. Our examination of the distribution of  
305 genomic and phenotypic variation across the range of this species provides valuable  
306 information for sourcing seed for restoration, including empirically defining local  
307 provenances and matching genotypes to predicted future environmental conditions.

308 Examining the relationship between genomic and geographic distance, we  
309 are able to empirically define "local" in this species to be on the order of 500 km, which  
310 is substantially farther than the current practice. This new definition encourages  
311 restoration projects to source seed more broadly across the landscape. In a highly  
312 fragmented landscape this will increase the number of potential source sites, potentially

313 enabling the collection of higher quality seed with increased genetic diversity  
314 (Broadhurst et al., 2008). Incorporating more naturally occurring genomic variation can  
315 increase the adaptive potential of the restored population by providing the substrate for  
316 adaptation to rapidly changing environmental conditions.

317 By modelling genomic variation across the landscape, we can understand the  
318 environmental factors that shape patterns of genomic variation and identify variation  
319 suitable for predicted future climates. We found several environmental variables that  
320 have played a role in the structure of genomic variation across the landscape. Of these,  
321 the climate variables are predicted to change rapidly over time. Change in soil nitrogen  
322 content might occur over longer time scales, but it is difficult to forecast due to complex  
323 biotic feedbacks (Brevik, 2013). This suggests that optimal seed sourcing will need to  
324 balance the tracking of rapidly changing climate variables with the need to account for  
325 variables that are more stable due to their dependence on stable features of geology,  
326 topography, or hydrology. This also highlights an important concern that key  
327 environmental variables may become uncoupled, resulting in less than ideal conditions  
328 for this species across the landscape.

329 Our analyses of phenotypic variation found no site-specific variation in  
330 phenotypic plasticity that would enable us to identify provenances better able to cope  
331 with rapid environmental change. However, plasticity is trait specific and traits that are  
332 hypothesized to be important for establishment and survival should continue to be  
333 investigated because they may provide valuable information for restoration projects.  
334 Importantly, our growth experiments support the results of the genomic analyses,  
335 showing the remarkable extent of variation both among sites and within sites, further  
336 supporting our recommendation to source seed to incorporate the high level of variation  
337 that occur naturally in *E. melliodora*.

338 The results of this study are promising for the future of *E. melliodora* across its  
339 native distribution. We found high genomic and phenotypic diversity within sites, as well  
340 as shared across the range. This naturally occurring variation can provide a basis for  
341 adaptation to a rapidly changing environment and it should be incorporated into  
342 restoration projects through strategic seed sourcing. It is important to note that our

343 genomic analyses were based on mature trees that predate extensive land clearing for  
344 agriculture. The same analyses in seedlings or saplings at these sites may show  
345 different results, although our phenotypic studies using seedlings produced concordant  
346 results. It remains to be determined if human modifications of the landscape have  
347 disrupted historical patterns of gene flow, resulting in more fragmented and inbred  
348 populations.

349 Our landscape genomic model can guide seed selection by empirically  
350 defining local provenances and identifying variation suitable for predicted future  
351 climates. This understanding of the relationship between environmental and genomic  
352 variation can be combined with other types of information, such as basic biological  
353 knowledge of the ecological community and best agronomic practices in restoration, to  
354 establish foundation species and ecosystems with the highest probability of success in  
355 a rapidly changing environment.

## 356 **Methods**

### 357 **Sample Collection**

358 We obtained *E. melliodora* leaf samples from mature trees at 38 sites across the  
359 species' range through a community science project described in Broadhurst et al. (*in*  
360 *review*) (Supplemental Table S1). From each site, a citizen scientist collected leaf  
361 samples from up to 30 trees, put the samples in silica gel for drying, and shipped them  
362 to CSIRO for processing. In addition to leaf material, they also collected seeds from the  
363 sampled trees when available. We sampled an additional seven trees planted at a  
364 single site in Western Australia, well outside the species' natural distribution.

### 365 **Genotyping by Sequencing**

366 We selected 3 to 10 trees per sampling site for sequencing and we processed each of  
367 the seven trees from Western Australia twice, using different leaves from the same tree,  
368 to serve as technical replicates. No power analysis was used to determine sample size

369 during the design of the study. Sample size was determined based on our experience  
370 and judgment, with consideration of the availability of samples. We sequenced these  
371 379 samples using a modified Genotyping-By-Sequencing (GBS) protocol (Elshire et  
372 al., 2011). Briefly, we extracted genomic DNA from approximately 50 mg of leaf tissue  
373 using the Qiagen DNeasy Plant 96 Kit, digested with PstI for genome complexity  
374 reduction, and ligated with a uniquely barcoded sequencing adapter pair. We then  
375 individually PCR amplified each sample to avoid sample bias. We pooled samples in  
376 equimolar concentrations and extracted library amplicons between 350 and 600 bp from  
377 an agarose gel. We sequenced the library pool on an Illumina HiSeq2500 using a 101-  
378 bp paired-end protocol at the Biomolecular Resource Facility at the Australian National  
379 University, generating almost 260 million read pairs.

380 We checked the quality of the raw sequencing reads with FastQC (v0.10.1,  
381 (Andrews, 2012)). We used AXE (v0.2.6, (Murray & Borevitz, 2017a)) to demultiplex the  
382 sequencing reads according to each sample's unique combinatorial barcode and were  
383 unable to assign 11% of read pairs to a sample. We used trimit from libqcpp (v0.2.5,  
384 (Murray & Borevitz, 2017b)) to clean the reads for each sample, using default  
385 parameters, except  $q=20$ . This involved removing adapter contamination due to read-  
386 through of small fragments (20% of read pairs) and merging overlapping pairs (49% of  
387 read pairs), both steps using algorithms based on a global alignment of read pairs. We  
388 also used trimit for sliding window quality trimming (11% of reads). We then used a  
389 custom script to remove sequencing reads that did not begin with the expected  
390 restriction site sequence (16% of reads). We aligned sequencing reads to the *E.*  
391 *grandis* reference genome (v2.0, (Bartholomé et al., 2015; JGI, 2015; Myburg et al.,  
392 2014)), including all nuclear, chloroplast, mitochondrial, and ribosomal scaffolds, but  
393 used only nuclear scaffolds for downstream analyses. We aligned reads using bwa-  
394 mem (v0.7.5a-r405, (Li, 2013)), as paired reads (-p) and treating shorter split hits as  
395 secondary alignments (-M), with 88% of reads successfully mapped. We used GATK's  
396 HaplotypeCaller in GVCF mode (v3.6-0-g89b7209, (McKenna et al., 2010)) to call  
397 variants for each sample with heterozygosity (-hets) increased to 0.005, indel

398 heterozygosity (-indelHeterozygosity) increased to 0.0005, and the minimum number of  
399 reads sharing the same alignment start (-minReadsPerAlignStart) decreased to 4.

400 We used GATK's GenotypeGVCFs (v3.6-0-g89b7209, (McKenna et al.,  
401 2010)) for a preliminary round of joint genotyping across all samples based on the  
402 individual variant calls and again increasing the heterozygosity (-hets) to 0.005 and the  
403 indel heterozygosity (-indelHeterozygosity) to 0.0005. For basic filtering, we used GATK  
404 to remove variants that were indels, had no variation relative to the reference, were non-  
405 biallelic SNPs, had  $QD < 2.0$  ("variant call confidence normalized by depth of sample  
406 reads supporting a variant"),  $MQ > 40.0$  ("Root Mean Square of the mapping quality of  
407 reads across all samples"), or  $MQRankSum < -12.5$  ("Rank Sum Test for mapping  
408 qualities of REF versus ALT reads"). We removed samples with more than 60% missing  
409 data and SNPs with more than 80% missing data. We examined the genomic distance  
410 between samples to verify that technical replicates clustered closely together. We used  
411 a preliminary PCA, based on genomic distance between samples, to identify outlier  
412 samples. We removed outlier samples and poorly sequenced samples from the dataset  
413 for final genotyping and all downstream analyses.

414 We reran GATK's joint genotyping on the final sample set. We again used  
415 GATK to remove variants that were indels, SNPs with no variation relative to the  
416 reference, and non-biallelic SNPs. We determined final filtering thresholds by  
417 examining parameter distributions. A locus was retained for subsequent analysis if  
418  $ExcessHet < 13.0$  ("phred-scaled p-value for exact test of excess heterozygosity"),  
419  $-0.3 < InbreedingCoeff < 0.3$  ("likelihood-based test for the inbreeding among samples"),  
420  $MQ > 15.0$  ("Root Mean Square of the mapping quality of reads across all samples"),  
421  $-10.0 < MQRankSum < 10.0$  ("Rank Sum Test for mapping qualities of REF versus ALT  
422 reads"), and  $QD > 8.0$  ("variant call confidence normalized by depth of sample reads  
423 supporting a variant"). We ran a second preliminary PCA analysis to identify additional  
424 outlier samples. Finally, we used VCFtools (v0.1.12b, (Danecek et al., 2011)) to remove  
425 SNPs with greater than 60% missing data and thin the SNPs so that none were closer  
426 than 300 bp.



## 427 **Genomic Analyses**

428 To examine the genomic structure of *E. melliodora* and how it is influenced by  
429 geography, we conducted individual-based analyses. For these analyses, we converted  
430 the final genotypic data (a vcf file) to a sample-by-SNP matrix and imported it into a  
431 `genind` object (R `adegenet` v2.0.1, (Jombart, 2008)). We calculated the pairwise  
432 genomic distances between individuals using a euclidean distance in `dist` (R `stats`  
433 v3.1.2, (R Core Team, 2015)). To visualize the genomic distance among samples, we  
434 ran a PCA using `dudi.pco` (R `ade4` v1.7-4, (Dray & Dufour, 2007)). We plotted the first  
435 two PCA components, with samples colored in a rainbow gradient based on sample  
436 latitude. We calculated the geographic distance between samples based on their GPS  
437 coordinates using `earth.dist` (R `fossil` v0.3.7, (Vavrek, 2011)). We used a `mantel` test (R  
438 `vegan` v2.4-0, (Oksanen et al., 2016)) to quantify the linear relationship between the  
439 genomic distance between individuals and the natural log of geographic distance.

440 To examine the role that environmental factors play in driving the genomic  
441 structure across the landscape, we used Generalized Dissimilarity Modelling (GDM),  
442 which uses matrix regression to estimate the non-linear relationship between genomic  
443 distance and environmental distance (Ferrier et al., 2007; Fitzpatrick & Keller, 2015;  
444 Thomassen et al., 2011). We then used this model to predict the distribution of genomic  
445 variation across the landscape under current environmental conditions, as well as  
446 predicted future conditions. We obtained environmental data for the GDM from climate,  
447 elevation, soil, and landscape raster layers. Climate variables included 19 bioclimatic  
448 variables for the current time period (1960-1990), at 30 arc second resolution  
449 (WorldClim, 2016b). Elevation was from a digital elevation model aggregated from 90  
450 m resolution (CGIAR-CSI, 2016). Soil data included available water capacity, total  
451 nitrogen, and total phosphorus sampled at the surface (0-5 cm) and at depth (100-200  
452 cm) (CSIRO, 2016). Landscape data included the Prescott Index (a measure of water  
453 balance) and MrVBF (a topographic index) (CSIRO, 2016). For future prediction, we  
454 used the 19 bioclimatic variables predicted for 2070 at 30 arc second resolution based  
455 on GCM MIROC5 for representative concentration pathway 8.5 (WorldClim, 2016a),  
456 which is a greenhouse gas concentration trajectory showing continual increase in

457 emissions over time. We determined the values for each variable at each sampling site  
458 based on GPS coordinates and used those values to calculate the environmental  
459 distances between sites.

460 To determine the genomic distances between sampling sites, we used the  
461 sample by SNP matrix to calculate pairwise  $F_{st}$  (Weir & Cockerham, 1984) using  
462 *pairwise.WCfst* (R hierfstat v0.04-22, (Goudet & Jombart, 2015)). We ran a sampling  
463 site level PCA on the pairwise  $F_{st}$  matrix using *dudi.pco* (R ade4 v1.7-4, (Dray & Dufour,  
464 2007)) and calculated the percent of variation explained for each PCA axis. For the  
465 GDM, we scaled the  $F_{st}$  matrix to between 0 and 1 by subtracting the minimum value  
466 and then dividing by the maximum value. We generated the GDM model using *gdm* (R  
467 *gdm* v1.2.3, (Manion et al., 2016)) with the scaled  $F_{st}$  matrix, geographic distance  
468 between sites, and environmental distances for the 28 variables for the current time  
469 period. Initially, we generated a GDM model for each environmental variable separately  
470 and excluded variables from further analysis if the deviance explained by the model was  
471 less than 5%. For the remaining variables, we calculated Pearson's correlation for site  
472 values between pairwise sets of variables. If a pair of variables had a correlation  
473 greater than 60%, we excluded the variable with the lowest explanatory power from  
474 subsequent analysis. We conducted permutation testing using *gdm.varImp* (R *gdm*  
475 v1.2.3, (Manion et al., 2016)) with 1000 permutations to determine the explanatory  
476 power and statistical significance of the remaining variables and excluded additional  
477 inconsequential variables. We generated a final GDM model with the remaining  
478 environmental variables.

479 We cross validated the GDM model using a random 70% of the spatial  
480 sampling sites as training data and the remaining 30% of sites as test data and ran  
481 1000 resampled iterations. We used the GDM models from the training sites to predict  
482 the genomic dissimilarity between the test sites and used Pearson's correlation to  
483 compare the predicted values to the observed values. To test the robustness of the  
484 geographic prediction from the GDM model, we visualized the geographic splines from  
485 100 of these GDM models.

486 To project the final GDM model onto the current environmental landscape, we  
487 first delineated the geographic extent of the analysis by defining an *E. melliodora*  
488 distribution polygon. We downloaded 14,977 *E. melliodora* occurrence records from the  
489 Atlas of Living Australia (ALA, 2016), of which we removed 189 because they were well  
490 outside the expected distribution or were sparse records on the distribution margin. We  
491 generated the polygon using ahull (R alphahull v2.1, (Pateiro-López & Rodríguez-Casal,  
492 2010)), with alpha=15 and gBuffer (R rgeos v0.3-21, (Bivand & Rundel, 2016)), with a  
493 20 km buffer. We then transformed the environmental rasters based on the model  
494 splines (*gdm.transform*), took a PCA of the transformed layers (*prcomp* R stats v3.1.2,  
495 (R Core Team, 2015)), and predicted across space (*predict*). We visualized the result  
496 by graphing the first three components of a PCA using a red-green-blue plot (Fitzpatrick  
497 & Keller, 2015). We also projected the model onto a predicted future environmental  
498 landscape with the same procedure, except we substituted the current bioclimatic  
499 rasters with the future ones for 2070 that were predicted under a high CO2 emission  
500 scenario. We calculated the expected change in the distribution of genomic variation  
501 over time using the *predict* function with time=T.

502 We examined the implications of the GDM model for seed sourcing decisions  
503 by selecting two hypothetical reforestation sites. We compared predicted future GDM  
504 values at these two hypothetical reforestation sites to current climate GDM values  
505 across the landscape of potential seed sources. This enabled us to generate a map of  
506 predicted genomic similarity of potential seed sources to the hypothetical reforestation  
507 sites under climate change.

## 508 **Growth Experiments**

509 To examine the effect of provenance and environment on phenotype, we conducted  
510 experiments in climate controlled growth chambers under two different climate regimes.  
511 No power analysis was used to determine sample size during the design of the  
512 experiment. Sample size was determined based on our experience and judgment, with  
513 consideration of the availability of seed and space in the growth chambers. We  
514 selected six sites (11, B, D, G, T1, T3) and six maternal trees per site that had sufficient

515 seed (asterisks in Fig. 1A). For each chamber, we grew eight or nine replicate  
516 seedlings from each maternal tree. To ensure we had a seedling for each intended  
517 replicate, four seeds were planted per pot (6.5 cm x 6.5 cm x 20 cm pots with soil that  
518 was 80% Martin's mix and 20% sand). We germinated seeds in climate controlled  
519 chambers with 12 hours of light at 25°C and 12 hours of dark at 15°C. We set lights to  
520 mimic summer morning light (photosynthetic photon flux 370 nm=82, 400 nm=83, 420  
521 nm=78, 450 nm=37, 530 nm=31, 620 nm=72, 660 nm=28, 735 nm=34, 850 nm=89,  
522 6500 K=94  $\mu\text{mol}/\text{m}^2/\text{s}$ ). We watered all seeds twice daily to keep the soil moist. We  
523 culled to one seedling per pot 12-14 days after planting.

524           Three weeks after germination, we sorted seedlings into treatment chambers  
525 based on a randomized block design. Climate conditions were determined with  
526 SolarCalc (Spokas & Forcella, 2006) to mimic average summer conditions (sampling  
527 site 11) and hotter conditions (5°C temperature increase; sampling site T3). We ran the  
528 experimental conditions for 12-14 weeks and took phenotypic measurements at five  
529 time points (1, 2, 3, 5, and 11 weeks after the experimental treatment began).  
530 Measurements included seedling height, number of leaves, and total leaf length.

531           For the analysis of seedling height and total leaf length, we used the  
532 measurements at five weeks after the experimental treatment began and used only  
533 seedlings that were determined to be well established at that time. We also calculated  
534 a relative height increment for each seedling by determining the last measurement  
535 when the seedling had two or fewer leaves and the first measurement with eight or  
536 more leaves. The relative height increment is the difference between the natural log of  
537 the two height measures, divided by the difference in time.

538           We investigated phenotypic plasticity by examining interaction plots between  
539 maternal line and experimental conditions for three response variables: seedling height,  
540 total leaf length, and relative height increment. We statistically tested for an interaction  
541 between sampling site/maternal line and experimental condition with linear mixed-effect  
542 models using *lmer* (R lme4 v1.1-10, (Bates et al., 2015)) for each of the three response  
543 variables. Due to a lack of power to consider maternal line nested within sampling site,  
544 we ran two models for each response variable—one with maternal line and one with

545 sampling site. These models included the experimental condition, sampling site or  
546 maternal line, and and their interactions as fixed effects. We included germination  
547 chamber and block as random effects. We identified outliers visually and ran the  
548 models with and without outliers to determine if they affected the results.

549 We visualized the distribution of values for the three response variables  
550 across the six sampling sites using box plots. We quantified the distribution of  
551 phenotypic variation with linear mixed-effect models using *lmer* (R lme4 v1.1-10, (Bates  
552 et al., 2015)). For each of the three response variables, the model included maternal  
553 line nested within sampling site and experimental condition as main effects, with no  
554 interaction term, and germination chamber and block as random effects.

555 After completion of the chamber experiment, we conducted an outdoor  
556 covered drought experiment on the 16 week old seedlings. No power analysis was  
557 used to determine sample size during the design of the experiment. Sample size was  
558 determined based on our experience and judgment, with consideration of the availability  
559 of space in the covered growth facility. We selected 160 seedlings from five sampling  
560 sites, with four maternal lines per site. We paired each seedling with a seedling of  
561 similar size from the same maternal line and treatment chamber. We randomly  
562 assigned each seedling of the pair to a different drought treatment group. We  
563 transplanted the seedlings to PVC tubes (9 cm diameter x 50 cm height with sand,  
564 perlite, and slow release osmocote) and kept them well watered for seven weeks,  
565 allowing them to acclimate to the outdoor conditions. Then we imposed two treatments:  
566 well watered and drought. For the well watered treatment, we watered the seedlings to  
567 saturation as needed (between three times per week and twice per day, depending on  
568 the weather). For the drought treatment, we watered as necessary to reach (but not  
569 exceed) 50% saturation.

570 We measured leaf traits on each seedling three weeks after the initiation of  
571 treatment. We measured stomatal conductance with a porometer (SC-1 Leaf  
572 Porometer by Decagon Devices) and determined that water stress was induced in the  
573 droughted seedlings. We determined the leaf length to width ratio from a scan of the  
574 most recent fully expanded leaf from each seedling using image analysis software

575 (WD3 WinDIAS Leaf Image Analysis System by Delta-T Devices). This leaf was  
576 initiated prior to the start of treatment, but expanded while under treatment conditions.  
577 We took additional measurements two months after the initiation of treatment. We used  
578 a chlorophyll meter (SPAD – 502 by Konica Minolta) to determine the SPAD index,  
579 which measures relative chlorophyll content; reduction in SPAD index would indicate  
580 detrimental effects of water limitation. We calculated specific leaf area (SLA, leaf area  
581 divided by dry mass) by scanning a single leaf from each seedling to determine the leaf  
582 area (WD3 WinDIAS Leaf Image Analysis System by Delta-T Devices) and weighed  
583 oven dried leaves. For analysis, we excluded data for seedlings that died during the  
584 experiment. We also excluded the experimental treatment pair of any dead seedlings.

585 We visualized phenotypic plasticity by examining interaction plots between  
586 maternal line and experimental conditions for four response variables: stomatal  
587 conductance, leaf length to width ratio, SPAD index, and SLA. We statistically tested for  
588 an interaction between sampling site/maternal line and experimental condition with  
589 linear mixed-effect models using *lmer* (R lme4 v1.1-10, (Bates et al., 2015)) for each of  
590 the four response variables. Due to a lack of power to consider maternal line nested  
591 within sampling site, we ran two models for each response variable--one with maternal  
592 line and one with sampling site. These models included the experimental condition,  
593 sampling site or maternal line, and their interactions as fixed effects. We included block  
594 and sample pairings as random effects.

595 We visualized the distribution of values for the four response variables across  
596 the five sampling sites using box plots. We quantified the distribution of phenotypic  
597 variation with linear mixed-effect models using *lmer* (R lme4 v1.1-10, (Bates et al.,  
598 2015)). For each of the four response variables, the model included maternal line  
599 nested within sampling site and experimental condition as main effects, with no  
600 interaction term, and block and sample pairings as random effects. Due to a lack of  
601 power, the p-value for the sampling site term was determined from a model without  
602 maternal line.

## 603 **Acknowledgments**

604 We thank the ANU Bioinformatics Consultancy for computational support and advice,  
605 the ANU Statistical Consulting Unit for statistical advice, the Centre for Biodiversity  
606 Analysis for advice on GDM modelling, and the ANU NCRIS Plant Growth Facility and  
607 RSB Plant Services for assistance with growth experiments.

## 608 **Data Access**

609 GBS sequencing reads are available at the NCBI Sequence Read Archive (SRA)  
610 (<http://www.ncbi.nlm.nih.gov/sra>) under BioProject PRJNA413429. Growth experiment  
611 data and scripts for genomic and phenotypic analyses are available at  
612 <https://github.com/LaMariposa/emelliodora>.

## 613 **References**

- 614 Aitken, S. N., & Whitlock, M. C. (2013). Assisted Gene Flow to Facilitate Local  
615 Adaptation to Climate Change. *Annual Review of Ecology, Evolution, and*  
616 *Systematics*, 44(1), 367–388. [https://doi.org/10.1146/annurev-ecolsys-110512-](https://doi.org/10.1146/annurev-ecolsys-110512-135747)  
617 [135747](https://doi.org/10.1146/annurev-ecolsys-110512-135747)
- 618 Aitken, S. N., Yeaman, S., Holliday, J. A., Wang, T., & Curtis-McLane, S. (2008).  
619 Adaptation, migration or extirpation: climate change outcomes for tree populations.  
620 *Evolutionary Applications*, 1(1), 95–111. [https://doi.org/10.1111/j.1752-](https://doi.org/10.1111/j.1752-4571.2007.00013.x)  
621 [4571.2007.00013.x](https://doi.org/10.1111/j.1752-4571.2007.00013.x)
- 622 ALA. (2016). Atlas of Living Australia. Retrieved November 24, 2016, from  
623 <http://www.ala.org.au/>
- 624 Andrew, R. L., Wallis, I. R., Harwood, C. E., & Foley, W. J. (2010). Genetic and  
625 environmental contributions to variation and population divergence in a broad-  
626 spectrum foliar defence of *Eucalyptus tricarpa*. *Annals of Botany*, 105(5), 707–717.  
627 <https://doi.org/10.1093/aob/mcq034>



- 628 Andrews, S. (2012). FastQC. Retrieved from  
629 <https://www.bioinformatics.babraham.ac.uk/projects/fastqc/>
- 630 Bartholomé, J., Mandrou, E., Jenkins, J., Nabihoudine, I., Klopp, C., Schmutz, J.,  
631 Plomion, C., & Gion, J.-M. (2015). High-resolution genetic maps of Eucalyptus  
632 improve Eucalyptus grandis genome assembly. *New Phytologist*, 206, 1283–1296.
- 633 Bates, D., Mächler, M., Bolker, B., & Walker, S. (2015). Fitting Linear Mixed-Effects  
634 Models Using lme4. *Journal of Statistical Software*, 67(1).  
635 <https://doi.org/10.18637/jss.v067.i01>
- 636 Bivand, R., & Rundel, C. (2016). rgeos: Interface to Geometry Engine - Open Source  
637 (GEOS).
- 638 Brevik, E. (2013). The Potential Impact of Climate Change on Soil Properties and  
639 Processes and Corresponding Influence on Food Security. *Agriculture*, 3(3), 398–  
640 417. <https://doi.org/10.3390/agriculture3030398>
- 641 Broadhurst, L. M., Lowe, A., Coates, D. J., Cunningham, S. A., McDonald, M., Vesk, P.  
642 A., & Yates, C. (2008). Seed supply for broadscale restoration: Maximizing  
643 evolutionary potential. *Evolutionary Applications*, 1(4), 587–597.  
644 <https://doi.org/10.1111/j.1752-4571.2008.00045.x>
- 645 Broadhurst, L. M., Mellick, R., Knerr, N., Li, L., & Supple, M. A. (n.d.). Land availability  
646 may be more important than genetic diversity in the range shift response of the  
647 widely distributed eucalypt *Eucalyptus melliodora* (Yellow Box, Myrtaceae).
- 648 Byrne, M., Prober, S. M., McLean, E. H., Steane, D. A., Stock, W. D., Potts, B. M., &  
649 Vaillancourt, R. E. (2013). *Adaptation to climate in widespread eucalypt species*.  
650 Gold Coast: National Climate Change Adaptation Research Facility.
- 651 CGIAR-CSI. (2016). SRTM 90m Digital Elevation Data. Retrieved September 5, 2016,  
652 from <http://srtm.csi.cgiar.org/>
- 653 CSIRO. (2016). Soil and Landscape Grid of Australia. Retrieved November 29, 2016,  
654 from <http://www.clw.csiro.au/aclep/soilandlandscapegrid/index.html>
- 655 Danecek, P., Auton, A., Abecasis, G., Albers, C. A., Banks, E., DePristo, M. A.,  
656 Handsaker, R. E., Lunter, G., Marth, G. T., Sherry, S. T., McVean, G., & Durbin, R.  
657 (2011). The variant call format and VCFtools. *Bioinformatics*, 27(15), 2156–2158.  
658 <https://doi.org/10.1093/bioinformatics/btr330>

- 659 Department of Environment and Climate Change and Water. (2011). National Recovery  
660 Plan for White Box - Yellow Box - Blakely's Red Gum Grassy Woodland and  
661 Derived Native Grassland.
- 662 Department of the Environment and Heritage. (2006). *EPBC Act Policy Statements:*  
663 *White Box - Yellow Box - Blakely's Red Gum grassy woodlands and derived native*  
664 *grasslands.*
- 665 Dray, S., & Dufour, A.-B. (2007). The ade4 Package: Implementing the Duality Diagram  
666 for Ecologists. *Journal of Statistical Software*, 22(4).  
667 <https://doi.org/10.18637/jss.v022.i04>
- 668 Elshire, R. J., Glaubitz, J. C., Sun, Q., Poland, J. A., Kawamoto, K., Buckler, E. S., &  
669 Mitchell, S. E. (2011). A robust, simple genotyping-by-sequencing (GBS) approach  
670 for high diversity species. *PloS One*, 6(5), e19379.  
671 <https://doi.org/10.1371/journal.pone.0019379>
- 672 Ferrier, S., Manion, G., Elith, J., & Richardson, K. (2007). Using generalized dissimilarity  
673 modelling to analyse and predict patterns of beta diversity in regional biodiversity  
674 assessment. *Diversity and Distributions*, 13(3), 252–264.  
675 <https://doi.org/10.1111/j.1472-4642.2007.00341.x>
- 676 Fitzpatrick, M. C., & Keller, S. R. (2015). Ecological genomics meets community-level  
677 modelling of biodiversity: Mapping the genomic landscape of current and future  
678 environmental adaptation. *Ecology Letters*, 18(1), 1–16.  
679 <https://doi.org/10.1111/ele.12376>
- 680 González-Orozco, C. E., Pollock, L. J., Thornhill, A. H., Mishler, B. D., Knerr, N., Laffan,  
681 S. W., Miller, J. T., Rosauer, D. F., Faith, D. P., Nipperess, D. A., Kujala, H., Linke,  
682 S., Butt, N., Külheim, C., Crisp, M. D., & Gruber, B. (2016). Phylogenetic  
683 approaches reveal biodiversity threats under climate change. *Nature Climate*  
684 *Change*, 1(12), 1110–1114. <https://doi.org/10.1038/nclimate3126>
- 685 Goudet, J., & Jombart, T. (2015). hierfstat: Estimation and Tests of Hierarchical F-  
686 Statistics.
- 687 Hoffmann, A., Griffin, P., Dillon, S., Catullo, R., Rane, R., Byrne, M., Jordan, R.,  
688 Oakeshott, J., Weeks, A., Joseph, L., Lockhart, P., Borevitz, J., & Sgrò, C. (2015). A  
689 framework for incorporating evolutionary genomics into biodiversity conservation  
690 and management. *Climate Change Responses*, 2(1).  
691 <https://doi.org/10.1186/s40665-014-0009-x>

- 692 JGI. (2015). *Eucalyptus grandis* v2.0 (Rose gum). Retrieved August 27, 2015, from  
693 [https://phytozome.jgi.doe.gov/pz/portal.html#!info?alias=Org\\_Egrandis\\_er](https://phytozome.jgi.doe.gov/pz/portal.html#!info?alias=Org_Egrandis_er)
- 694 Jombart, T. (2008). Adegnet: A R package for the multivariate analysis of genetic  
695 markers. *Bioinformatics*, 24(11), 1403–1405.  
696 <https://doi.org/10.1093/bioinformatics/btn129>
- 697 Li, H. (2013). Aligning sequence reads, clone sequences and assembly contigs with  
698 BWA-MEM. *arXiv*, 1303.3997v1.
- 699 Lindenmayer, D. B., Steffen, W., Burbidge, A. A., Hughes, L., Kitching, R. L., Musgrave,  
700 W., Stafford Smith, M., & Werner, P. A. (2010). Conservation strategies in response  
701 to rapid climate change: Australia as a case study. *Biological Conservation*, 143(7),  
702 1587–1593. <https://doi.org/10.1016/j.biocon.2010.04.014>
- 703 Manion, G., Lisk, M., Ferrier, S., Nieto-Lugilde, D., & Fitzpatrick, M. C. (2016). gdm:  
704 Functions for Generalized Dissimilarity Modeling.
- 705 McKenna, A., Hanna, M., Banks, E., Sivachenko, A., Cibulskis, K., Kernytsky, A.,  
706 Garimella, K., Altshuler, D., Gabriel, S., Daly, M., & DePristo, M. A. (2010). The  
707 Genome Analysis Toolkit: a MapReduce framework for analyzing next-generation  
708 DNA sequencing data. *Genome Research*, 20(9), 1297–1303.  
709 <https://doi.org/10.1101/gr.107524.110>
- 710 McLean, E. H., Prober, S. M., Stock, W. D., Steane, D. A., Potts, B. M., Vaillancourt, R.  
711 E., & Byrne, M. (2014). Plasticity of functional traits varies clinally along a rainfall  
712 gradient in *Eucalyptus tricarpa*. *Plant, Cell and Environment*, 37(6), 1440–1451.  
713 <https://doi.org/10.1111/pce.12251>
- 714 Murray, K. D., & Borevitz, J. O. (2017a). Axe: rapid, competitive sequence read  
715 demultiplexing using a trie. *bioRxiv*. <https://doi.org/10.1101/160606>
- 716 Murray, K. D., & Borevitz, J. O. (2017b). libqcpp : A C++14 sequence quality control  
717 library. *The Journal of Open Source Software*, 2(13).  
718 <https://doi.org/10.21105/joss.00232>
- 719 Myburg, A. A., Grattapaglia, D., Tuskan, G. A., Hellsten, U., Hayes, R. D., Grimwood, J.,  
720 ... Schmutz, J. (2014). The genome of *Eucalyptus grandis*. *Nature*, 509(7505),  
721 356–362. <https://doi.org/10.1038/nature13308>
- 722 Nicotra, A. B., Atkin, O. K., Bonser, S. P., Davidson, A. M., Finnegan, E. J., Mathesius,  
723 U., Poot, P., Purugganan, M. D., Richards, C. L., Valladares, F., & van Kleunen, M.

- 724 (2010). Plant phenotypic plasticity in a changing climate. *Trends in Plant Science*,  
725 15(12), 684–692. <https://doi.org/10.1016/j.tplants.2010.09.008>
- 726 Oksanen, J., Blanchet, F. G., Friendly, M., Kindt, R., Legendre, P., McGlinn, D., Minchin,  
727 P. R., O'Hara, R. B., Simpson, G. L., Solymos, P., Stevens, M. H. H., Szoecs, E., &  
728 Wagner, H. (2016). vegan: Community Ecology Package.
- 729 Pateiro-López, B., & Rodríguez-Casal, A. (2010). Generalizing the Convex Hull of a  
730 Sample : The R Package Alphahull. *Journal of Statistical Software*, 34(5).  
731 <https://doi.org/http://dx.doi.org/10.18637/jss.v034.i05>
- 732 Prober, S. M., Byrne, M., McLean, E. H., Steane, D. A., Potts, B. M., Vaillancourt, R. E.,  
733 & Stock, W. D. (2015). Climate-adjusted provenancing: a strategy for climate-  
734 resilient ecological restoration. *Frontiers in Ecology and Evolution*, 3(65).  
735 <https://doi.org/10.3389/fevo.2015.00065>
- 736 R Core Team. (2015). R: A language and environment for statistical computing. Vienna,  
737 Austria: R Foundation for Statistical Computing.
- 738 Spokas, K., & Forcella, F. (2006). Estimating hourly incoming solar radiation from limited  
739 meteorological data. *Weed Science*, 54(1), 182–189. [https://doi.org/10.1614/WS-](https://doi.org/10.1614/WS-05-098R.1)  
740 05-098R.1
- 741 Thomassen, H. A., Fuller, T., Buermann, W., Milá, B., Kieswetter, C. M., Jarrín-V., P., ...  
742 Smith, T. B. (2011). Mapping evolutionary process: A multi-taxa approach to  
743 conservation prioritization. *Evolutionary Applications*, 4(2), 397–413.  
744 <https://doi.org/10.1111/j.1752-4571.2010.00172.x>
- 745 Threatened Species Scientific Committee. (2006). *Advice to the Minister for the*  
746 *Environment and Heritage*.
- 747 Vavrek, M. J. (2011). Fossil: Palaeoecological and Palaeogeographical Analysis Tools.  
748 *Palaeontologia Electronica*, 14(1), 1–16.
- 749 Wang, I. J., & Bradburd, G. S. (2014). Isolation by environment. *Molecular Ecology*,  
750 23(23), 5649–5662. <https://doi.org/10.1111/mec.12938>
- 751 Weir, B. S., & Cockerham, C. C. (1984). Estimating F-Statistics for the Analysis of  
752 Population Structure. *Evolution*, 38(6), 1358–1370. <https://doi.org/10.2307/2409936>
- 753 Williams, A. V., Nevill, P. G., & Krauss, S. L. (2014). Next generation restoration  
754 genetics: Applications and opportunities. *Trends in Plant Science*, 19(8), 529–537.  
755 <https://doi.org/10.1016/j.tplants.2014.03.011>

756 WorldClim. (2016a). CMIP5 30-seconds. Retrieved September 30, 2016, from  
757 [http://www.worldclim.org/cmip5\\_30s](http://www.worldclim.org/cmip5_30s)

758 WorldClim. (2016b). WorldClim 1.4. Retrieved November 28, 2016, from  
759 <http://www.worldclim.org/current>

## 760 **Figure Legends**

### 761 **Figure 1: Map of sampling sites and PCA of genomic distance between samples**

762 (A) A map of the geographic locations of the 37 sampling sites in southeastern Australia.  
763 Sampling locations are labeled with the site name and color coded in a rainbow gradient based  
764 on latitude. Black asterisks indicate 6 sites used for growth chamber experiments. The gray  
765 background shading indicates the species distribution polygon. (B) Principal coordinate  
766 analysis of the genomic distance between individual samples. Samples are labeled with a  
767 sample name that indicates the site name and tree number. Samples are color coded by site to  
768 match the map. The percentage on each axis indicates how much of the genomic variation  
769 between individuals was explained by the axis. (C) Principal coordinate analysis of  $F_{st}$  between  
770 sampling sites. Sampling sites are labeled by name and color coded to match the map. The  
771 percentage on each axis indicates how much of the variation in  $F_{st}$  between sampling sites was  
772 explained by the axis.

### 773 **Figure 2: Estimated genomic variation as a function of geographic distance**

774 The geographic spline estimated from the GDM model showing little predicted genomic change  
775 between sites less than 500 km apart and increasing genomic variation as geographic distance  
776 increases beyond 500 km.

### 777 **Figure 3: Predicted spatial and temporal variation in genomic composition**

778 (A) The spatial distribution of predicted genomic variation based on projecting the GDM model  
779 onto geography and current environmental conditions. Regions with similar colors are predicted  
780 to have similar genomic composition. (B) The predicted temporal genomic variation based on  
781 comparing the GDM model projected onto current environmental conditions and predicted  
782 environmental conditions for 2070. The higher the difference (green colors), the more genomic

783 change predicted between current and 2070 conditions. Sampling sites are labeled in black  
784 text.

785 **Figure 4: Optimal seed sourcing locations for hypothetical reforestation sites**

786 The predicted genomic similarity of hypothetical reforestation sites (indicated by black circles) to  
787 potential seed sourcing locations under a climate change scenario for 2070. Dark green areas  
788 indicate seed sourcing areas predicted to best match future conditions at the hypothetical  
789 reforestation sites; white and brown areas indicate areas of potential genomic mismatch.

790 **Supplementary Figures**

791 **Figure S1: Technical replicate dendrogram**

792 Dendrogram based on genomic distance between samples showing the strong clustering of  
793 technical replicates (denoted with an "R" after the sample name and highlighted in yellow).  
794 Note that three of the technical replicates failed to pass quality control and are not included in  
795 the dendrogram. Additional sample pairs show strong clustering. In each case, the individuals  
796 of the pair are from the same sampling site, indicating samples that are closely related.

797 **Figure S2: Species identification PCA**

798 PCA of genomic distance between samples showing strong outliers that are likely misidentified  
799 samples or hybrids. The vertical line at 50 on PCA axis 1 indicates the cutoff, with all samples  
800 to the right removed from further analyses.

801 **Figure S3: Outlier PCA**

802 PCA of genomic distance between samples for the confirmed *E. melliodora* samples. The five  
803 samples on the left were deemed outliers and removed from further analyses.

804 **Figure S4: Generalized dissimilarity modelling (GDM) results**

805 (A) Non-linear relationship between environmental distance and genomic distance. Points are  
806 site pairs; the line is the predicted relationship. (B) Relationship between predicted genomic  
807 distance and observed genomic distance. Points are site pairs; the line indicates where  
808 observation and prediction match. (C-G) Predicted splines showing the estimated relationship  
809 between the environmental variable and genomic distance for (C) total nitrogen content at 100-  
810 200 cm of soil depth, (D) mean temperature of the coldest quarter, (E) precipitation of the

811 wettest quarter, (F) isothermality, and (G) geography. (H) Geographic splines from 100  
812 iterations of sampling 70% of sites. Each solid black line is an iteration; dashed grey line is the  
813 full model prediction.

814 **Figure S5: Variation in seedling growth in chamber experiment**

815 Box plots showing variation between chamber treatments (left) and sampling sites (right) for  
816 three seedling growth traits.

817 **Figure S6: Interaction plots for chamber experiment**

818 Plots showing interactions between three seedling growth traits and the experimental  
819 conditions. Each line represents a maternal line, with color indicating the sampling site.

820 **Figure S7: Variation in leaf traits in drought experiment**

821 Box plots showing variation between water treatments (left) and sampling sites (right) for four  
822 leaf traits.

823 **Figure S8: Interaction plots for drought experiment**

824 Plots showing interactions between the four leaf traits and the water treatment. Each line  
825 represents a maternal line, with color indicating the sampling site.

826 **Figure S9: Variation in leaf shape**

827 One representative leaf from each maternal line in the drought experiment. Each row shows a  
828 single sampling site, identified by site ID and state location (ACT=Australian Capital Territory,  
829 VIC=Victoria, NSW=New South Wales). Each leaf is identified by its sampling site, maternal  
830 line, and replicate number).



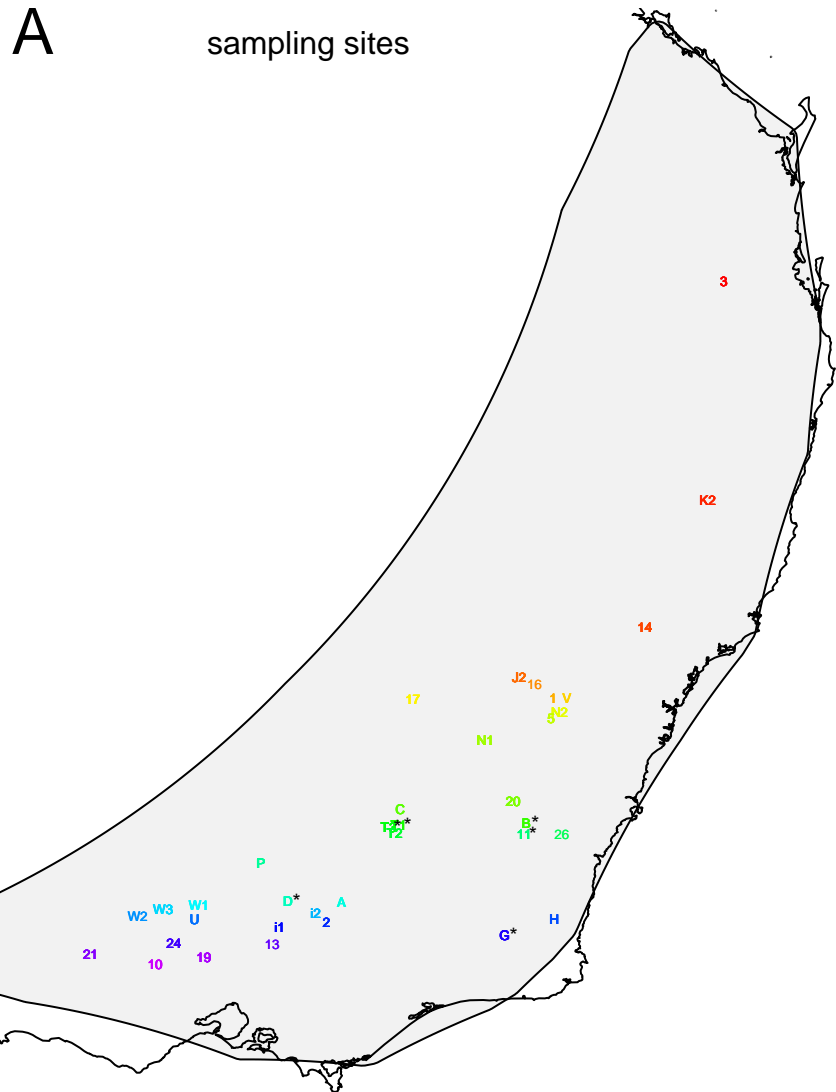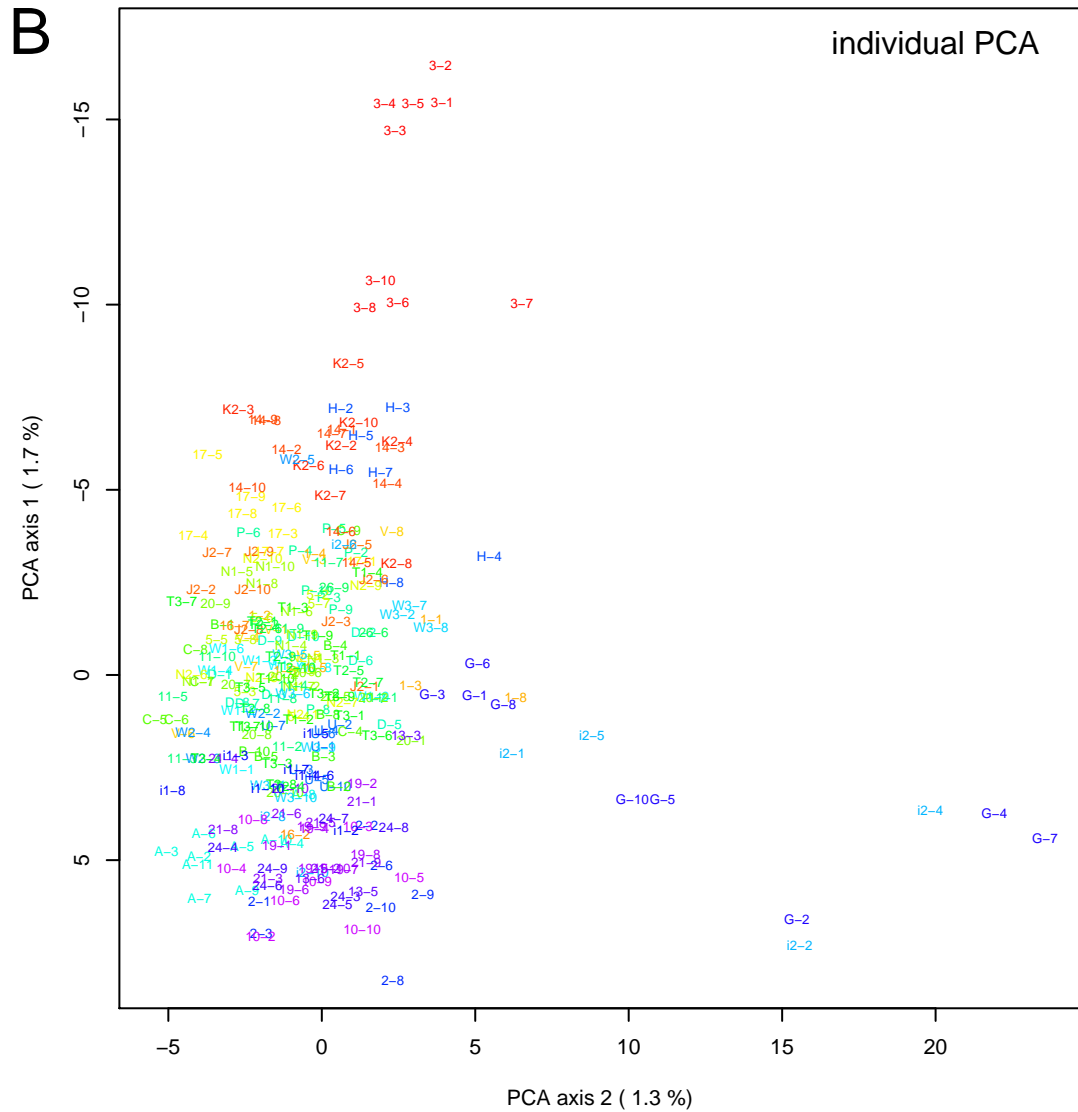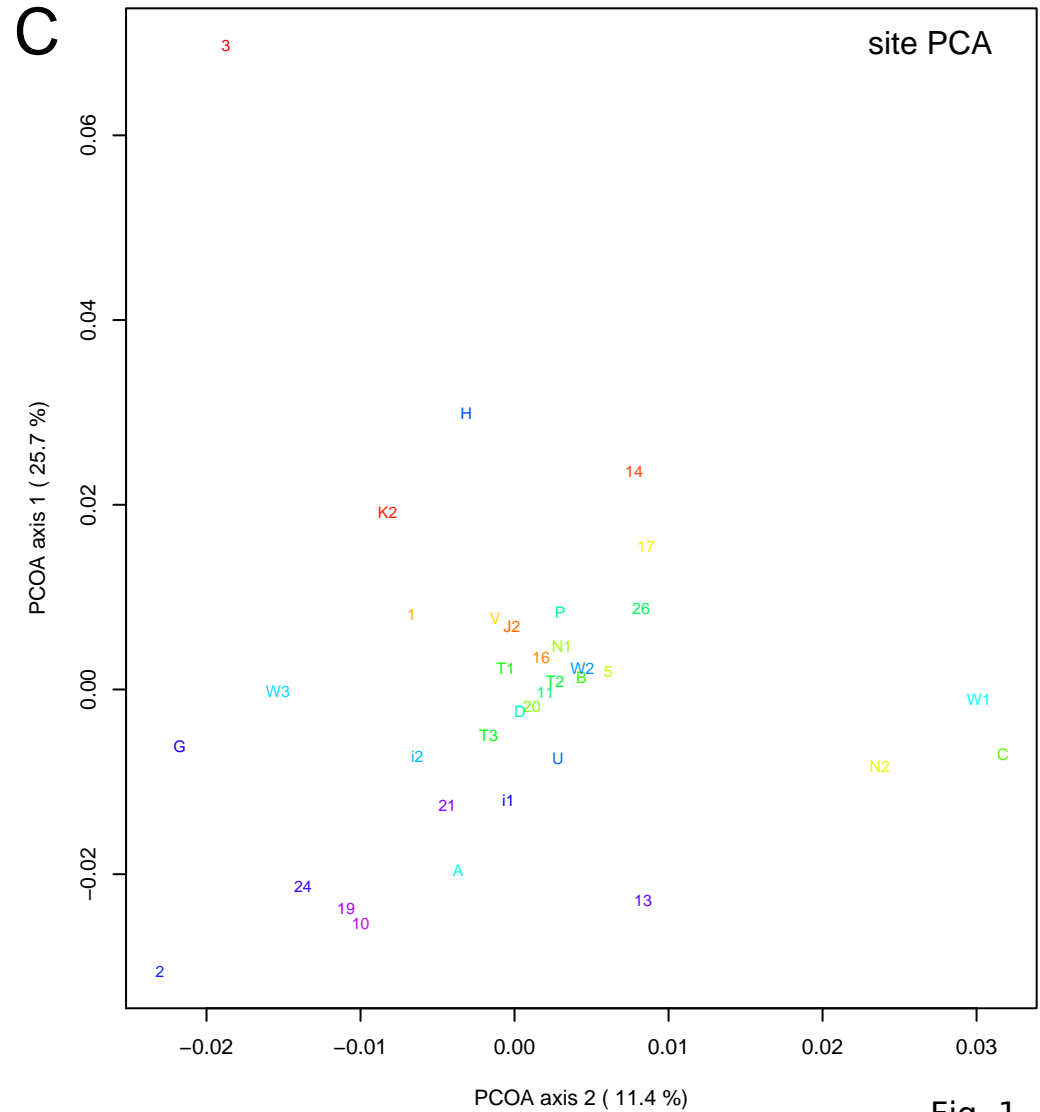

Fig. 1

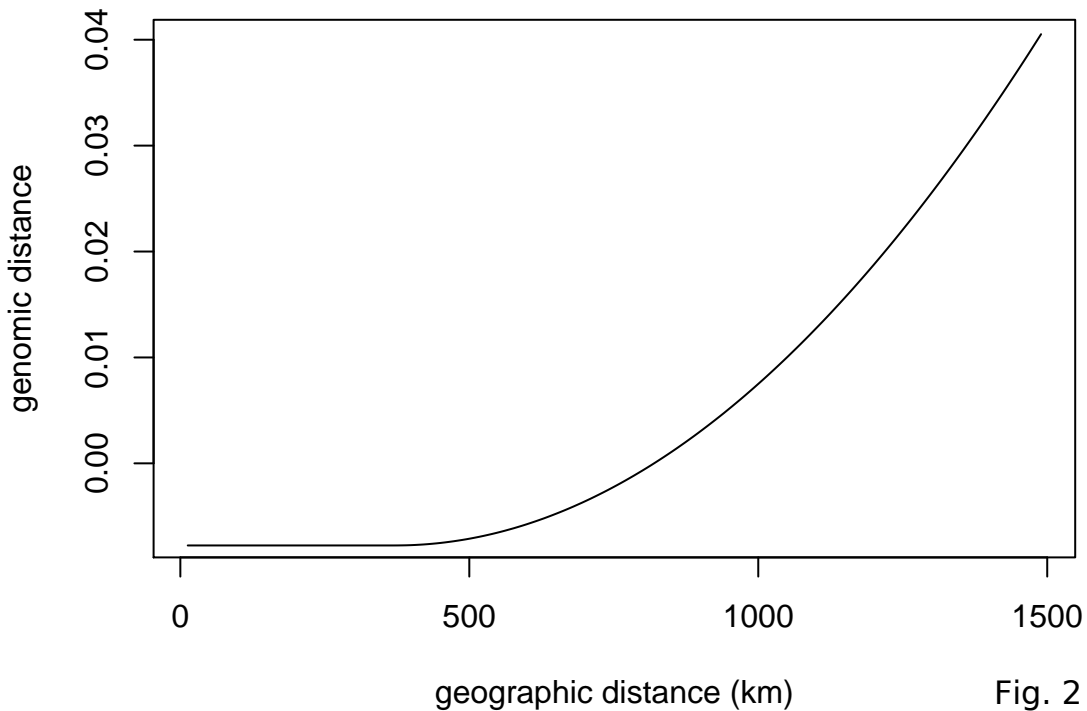

Fig. 2

# (A) Predicted Genomic Composition Across Space

bioRxiv preprint doi: <https://doi.org/10.1101/200352>; this version posted October 9, 2017. The copyright holder for this preprint (which was not certified by peer review) is the author/funder, who has granted bioRxiv a license to display the preprint in perpetuity. It is made available under aCC-BY 4.0 International license.

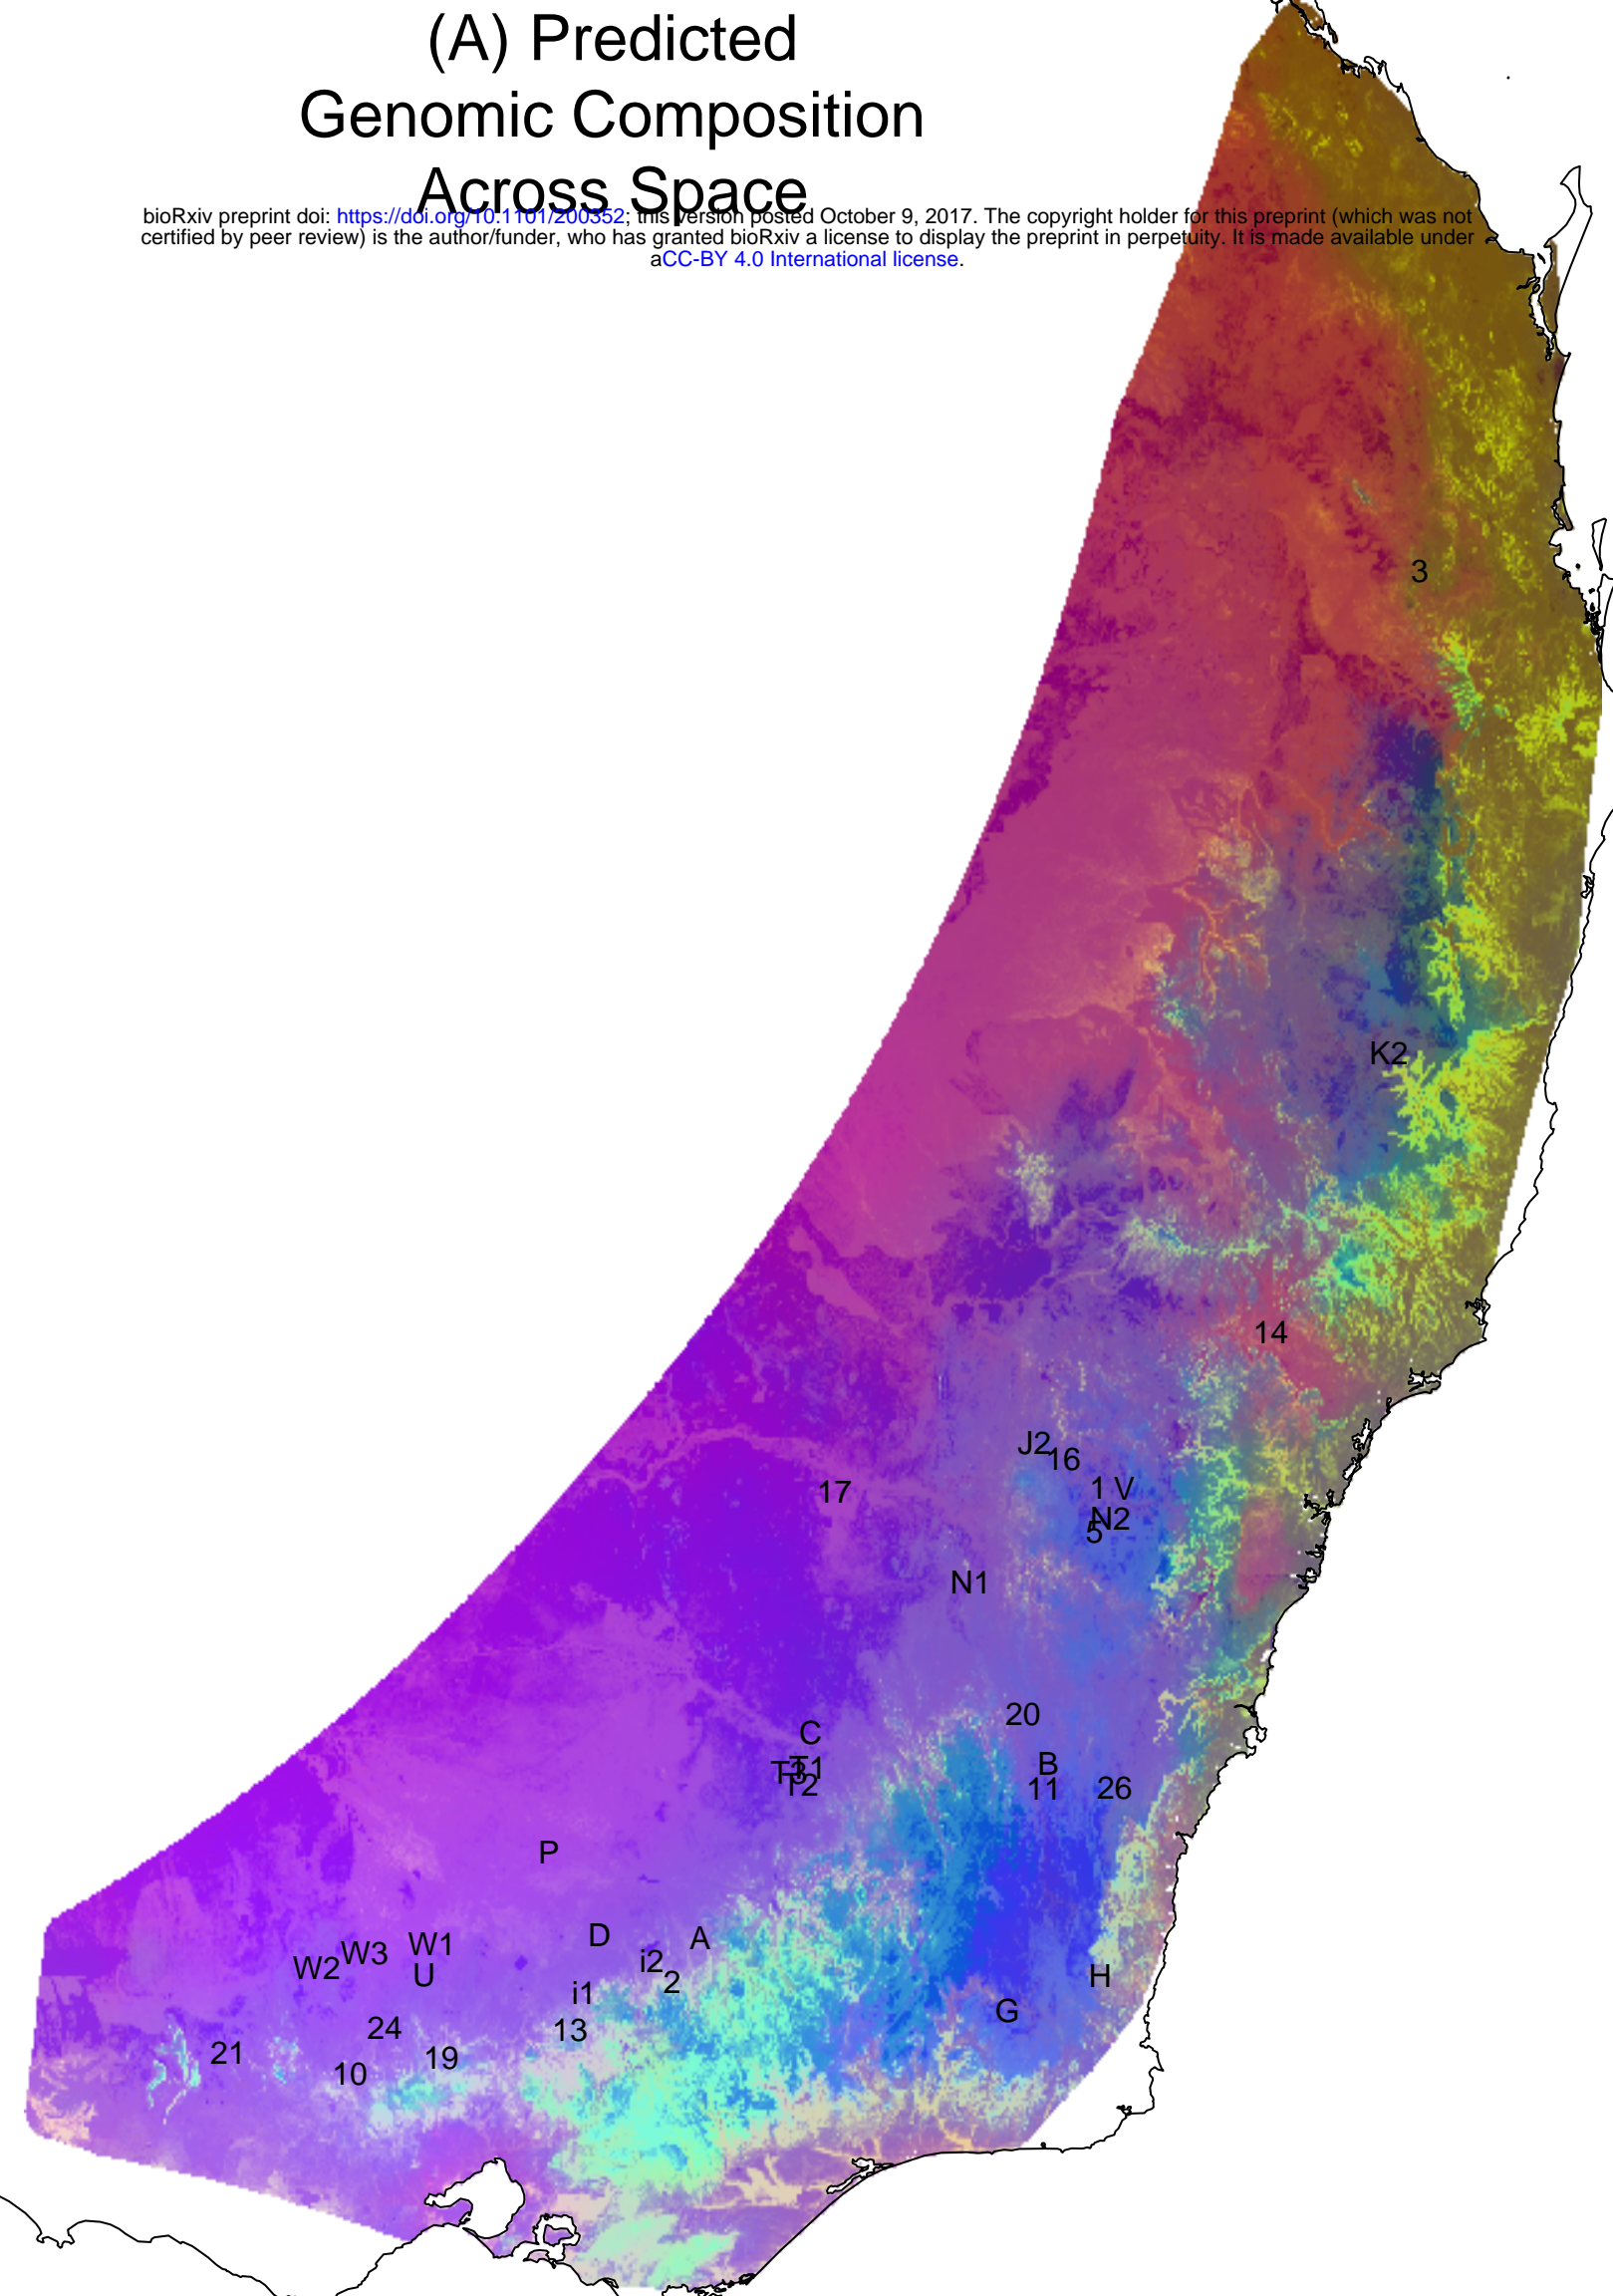

# (B) Predicted Change in Genomic Composition Over Time

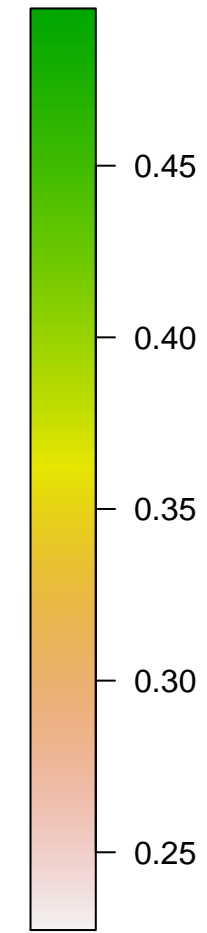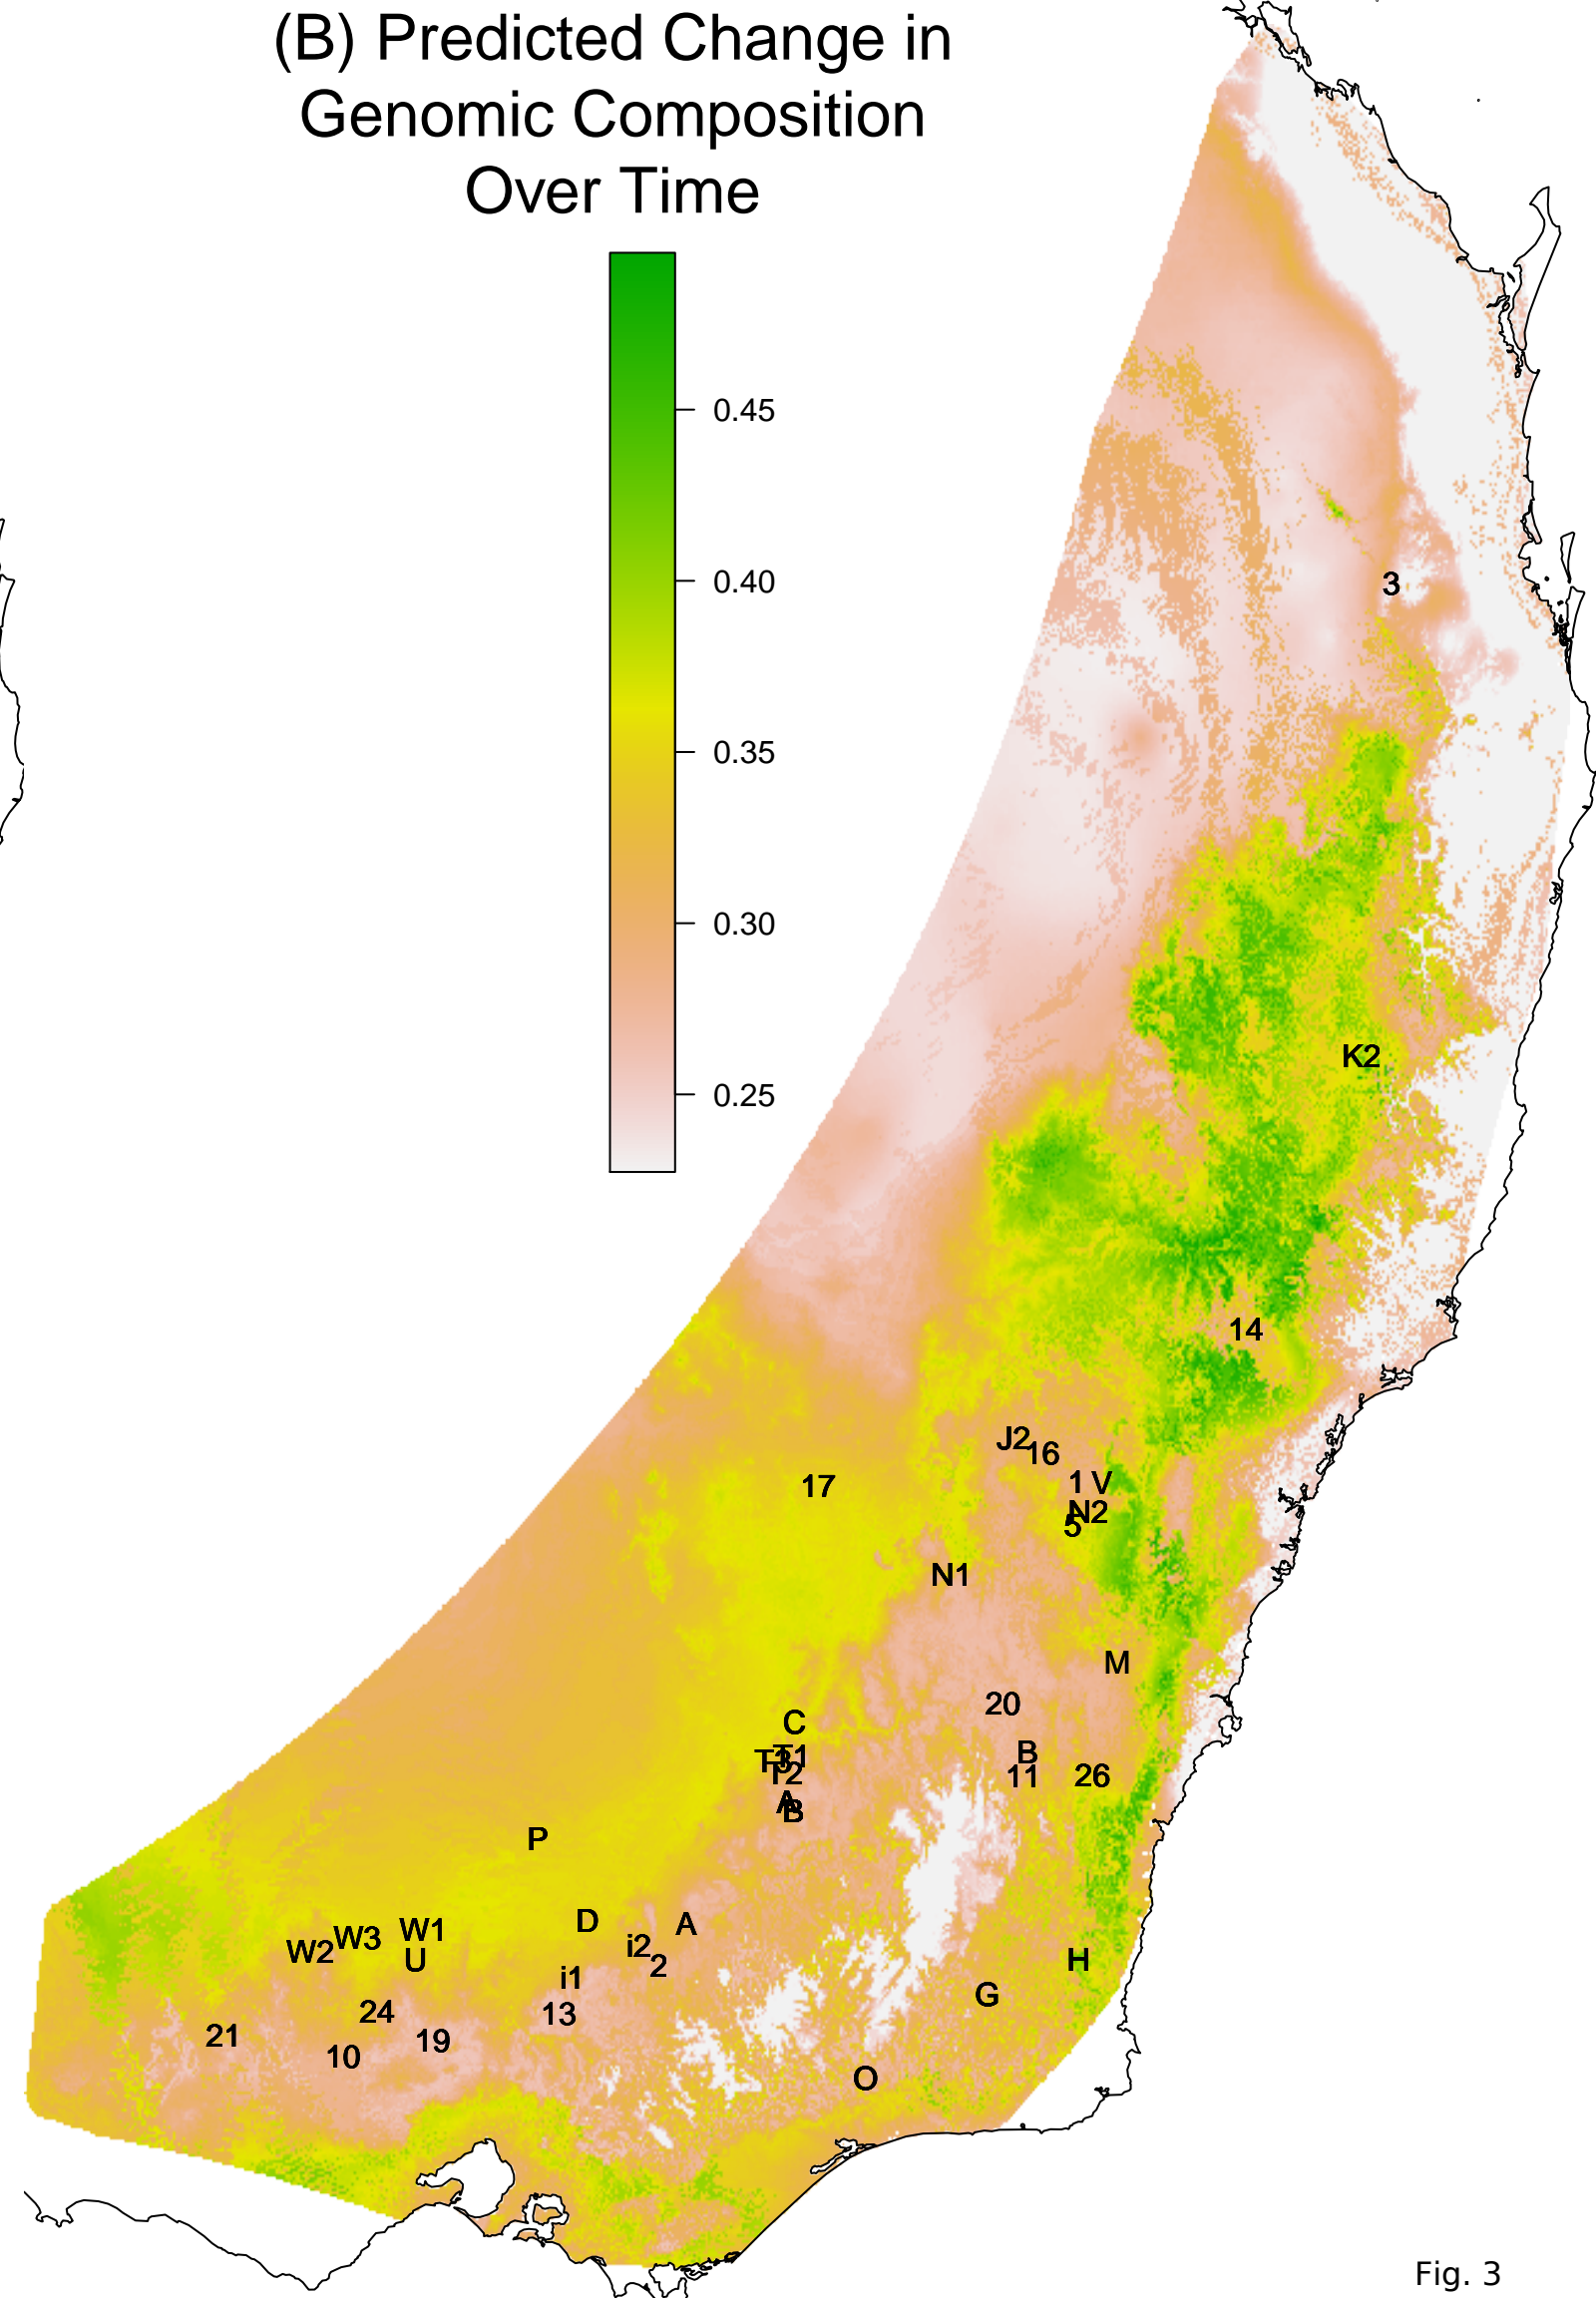

Fig. 3



# Strength of Match to Hypothetical Reforestation Sites

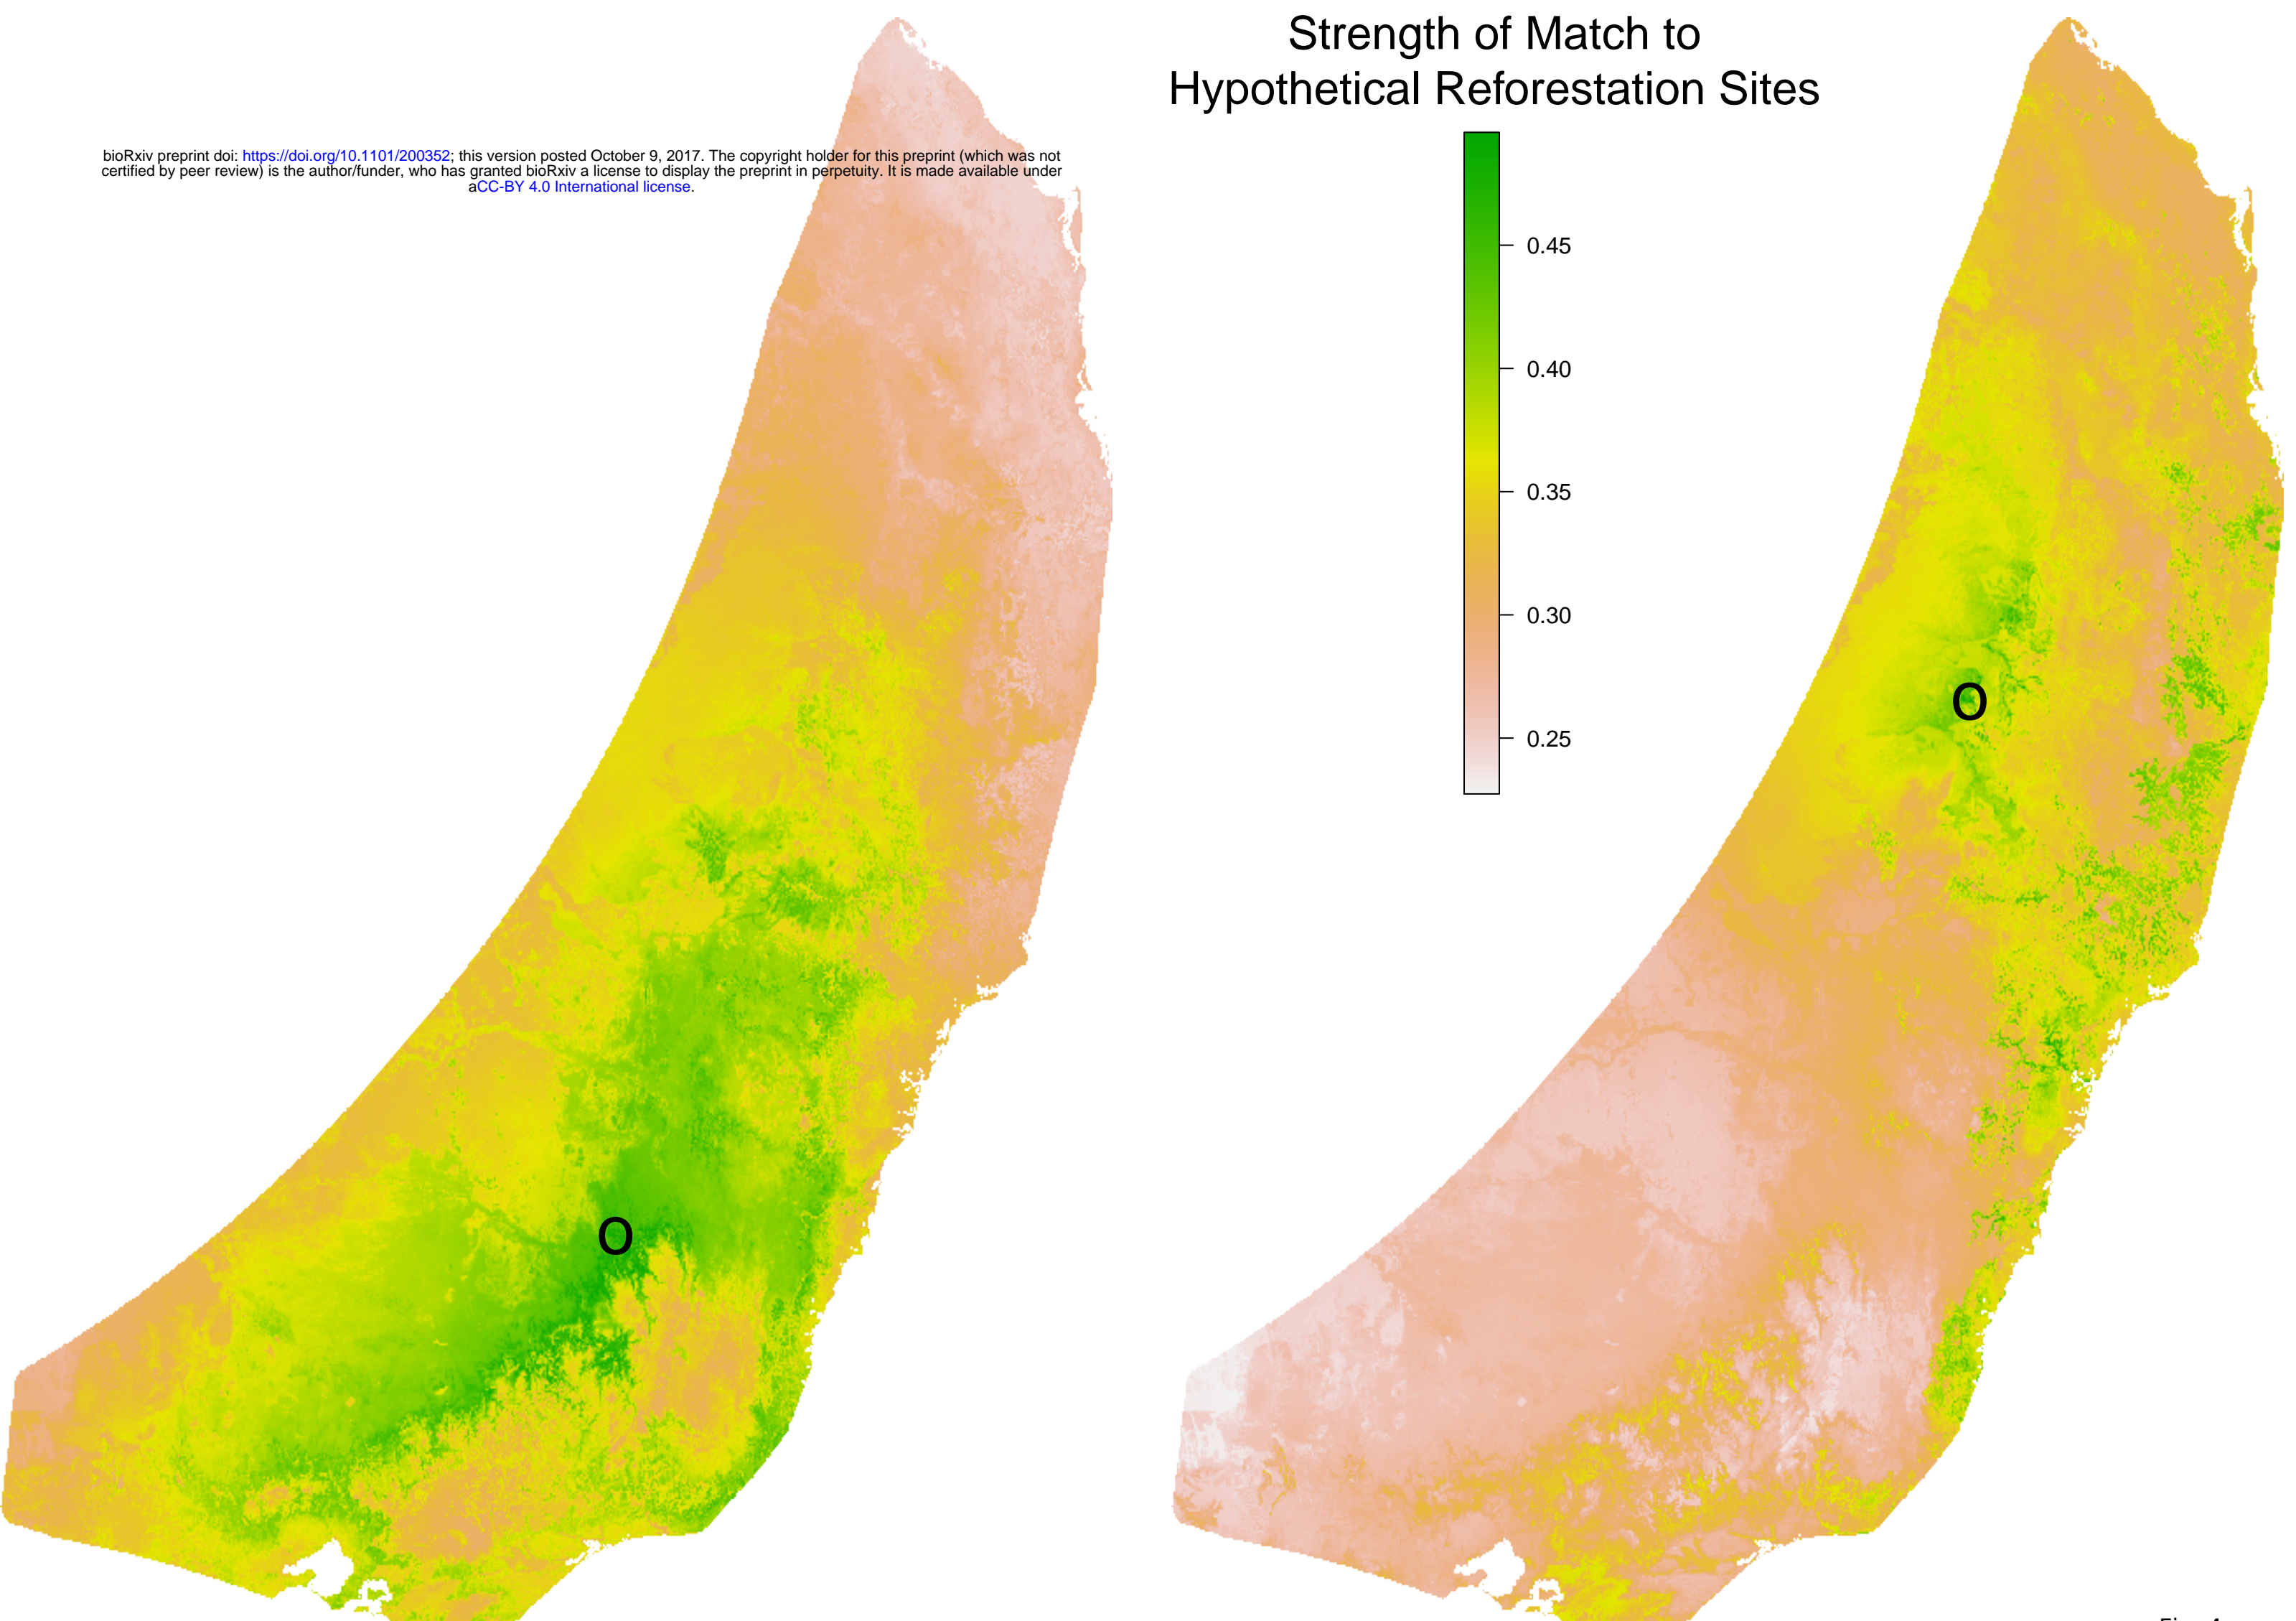

Fig. 4

# Cluster Dendrogram

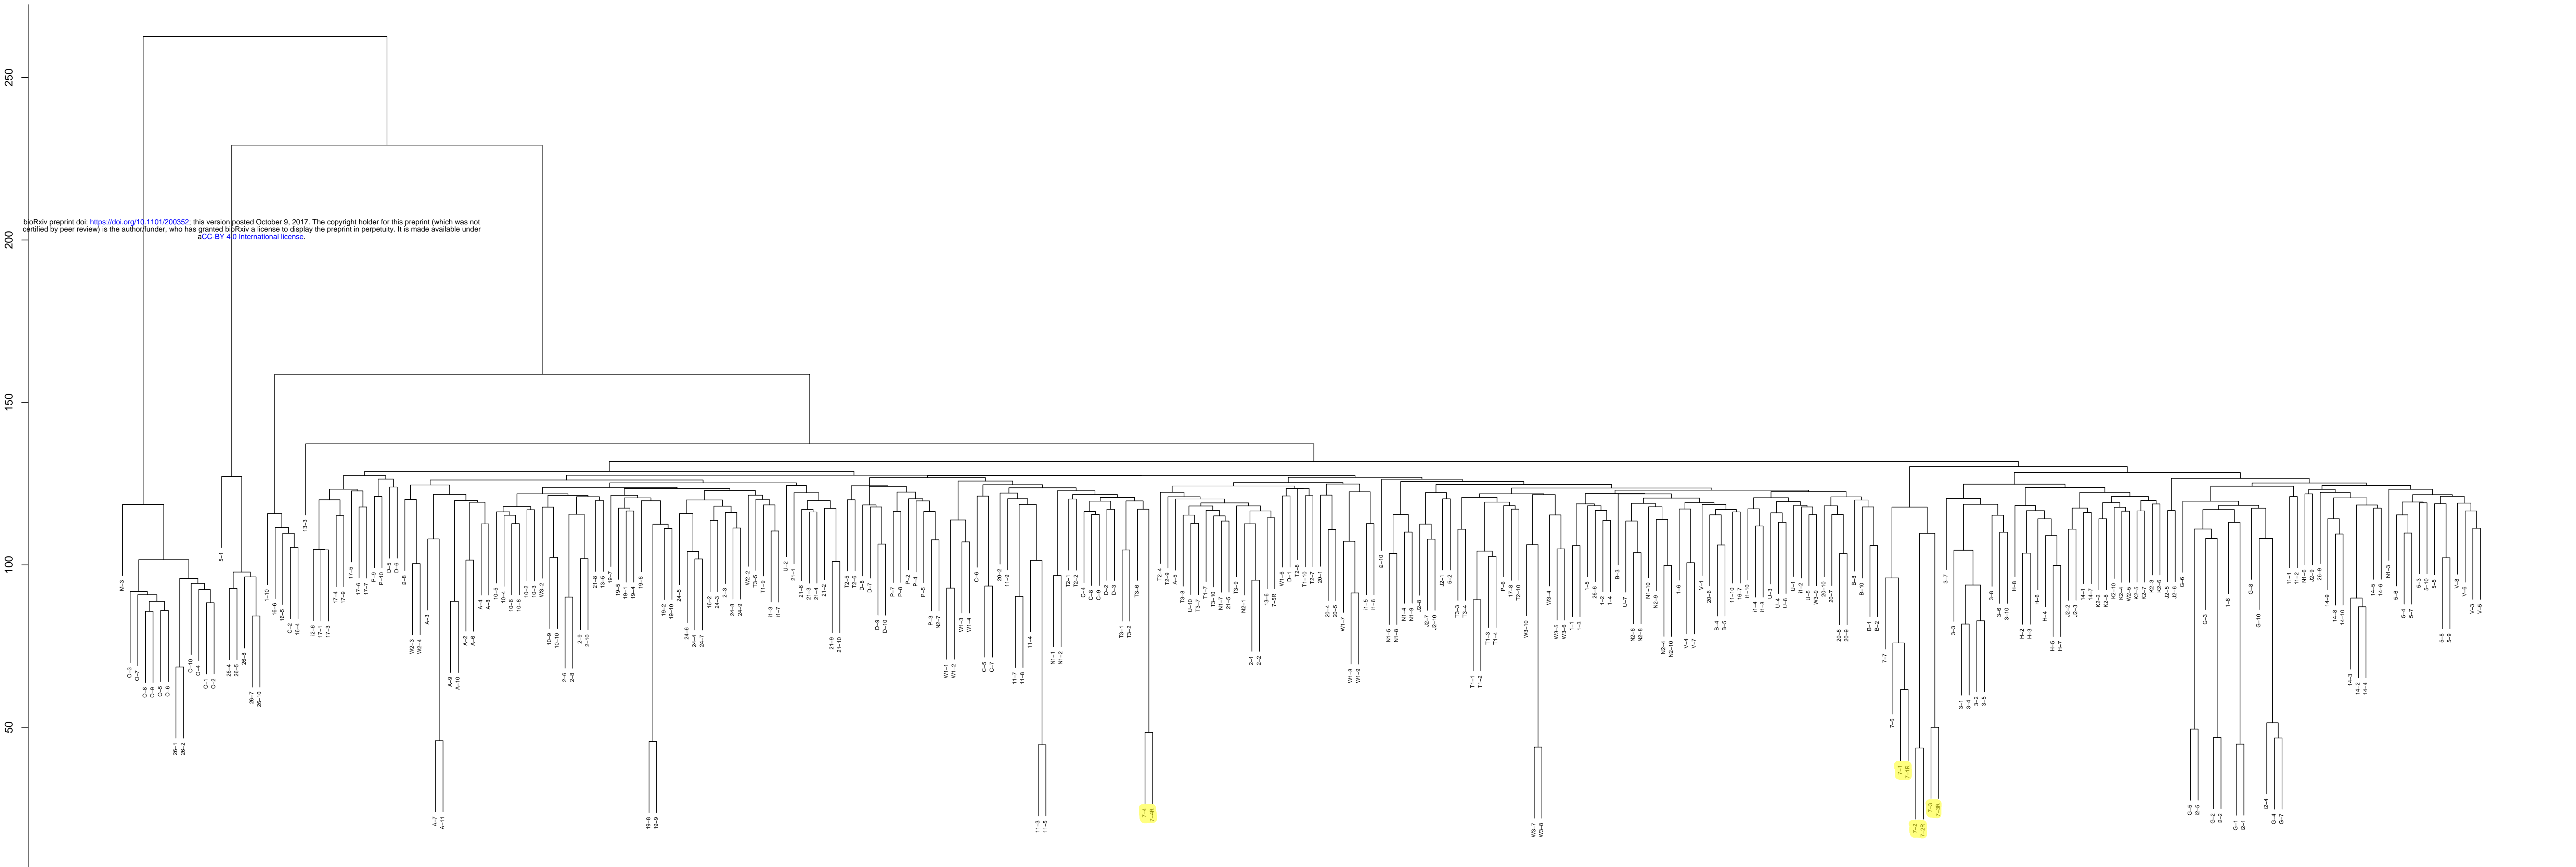

genomic distance  
hclust (\*, "complete")

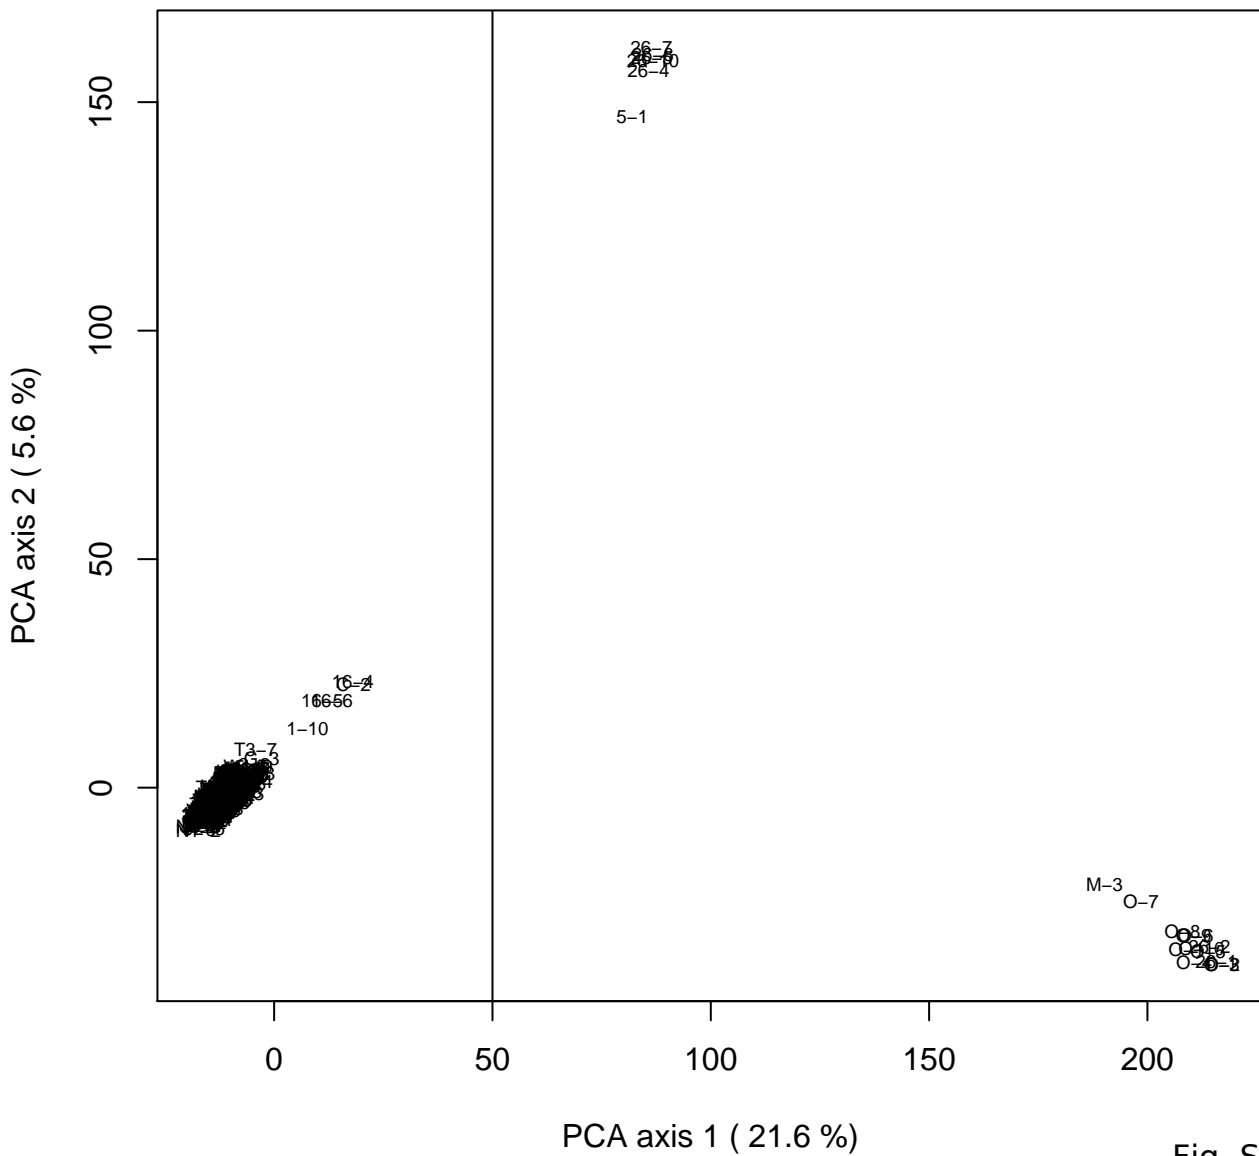

Fig. S2





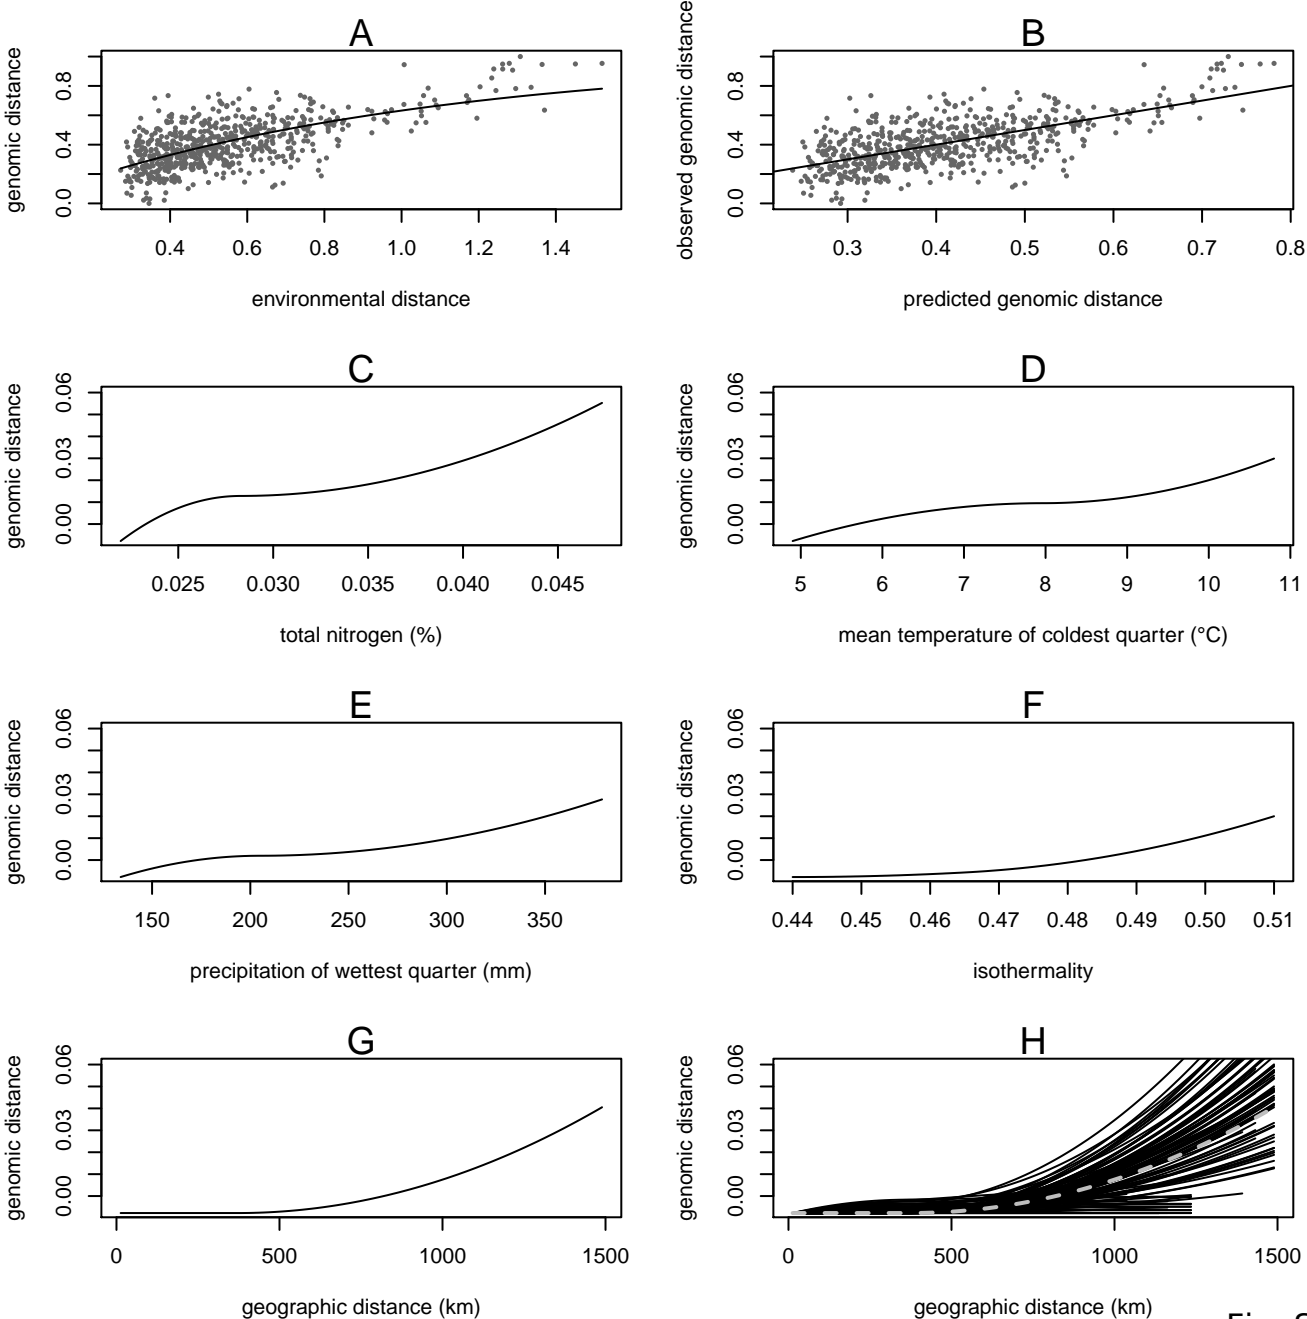

Fig. S4

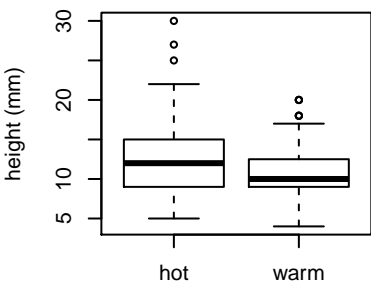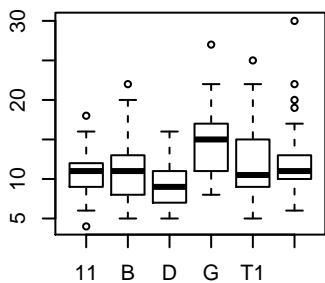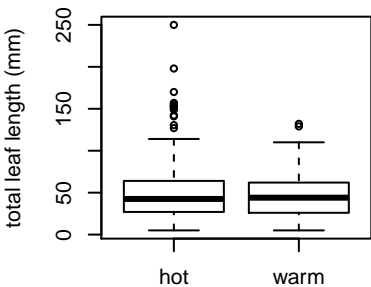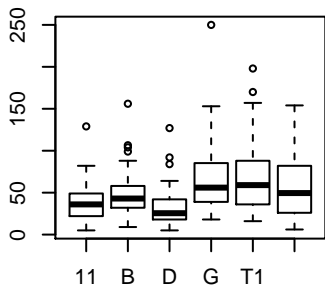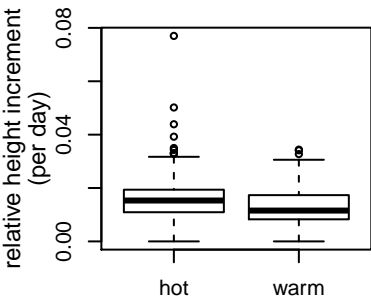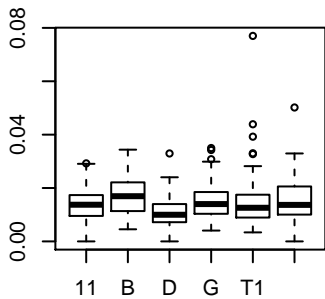

treatment

site Fig. S5

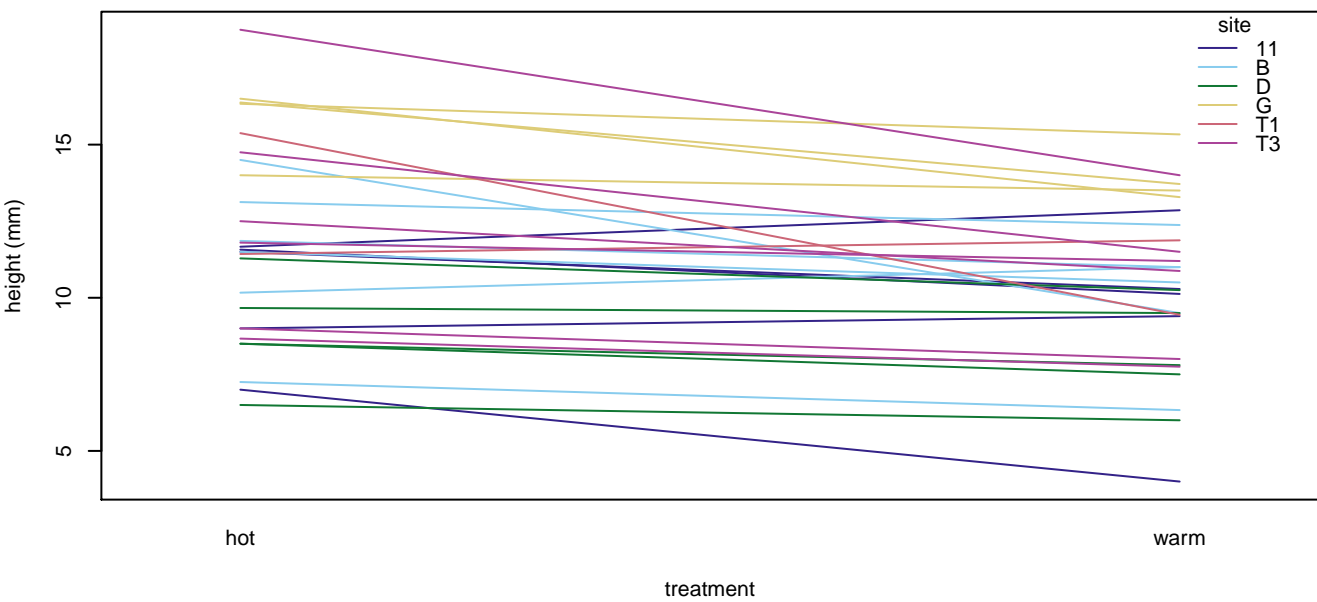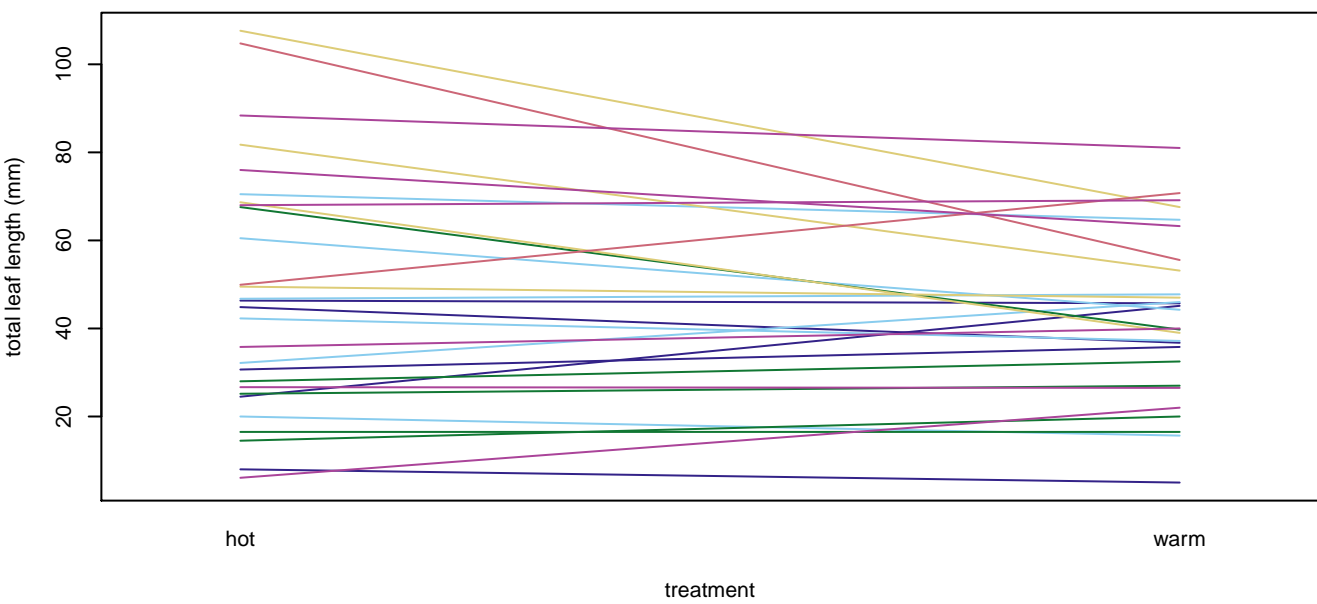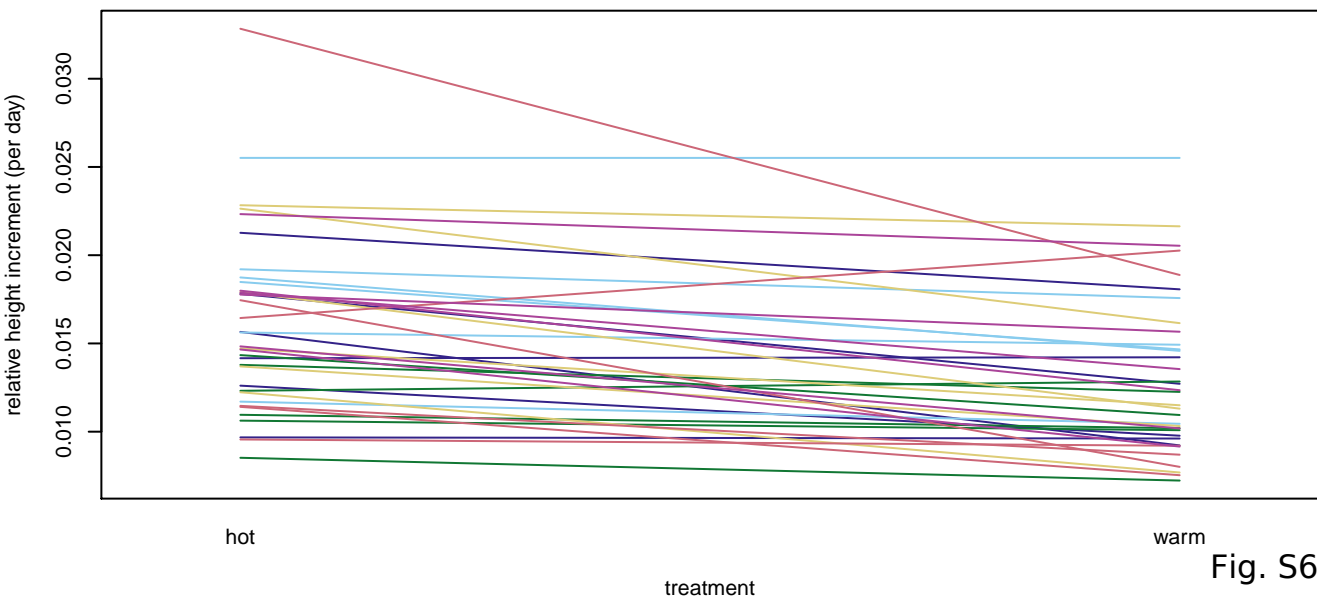

Fig. S6

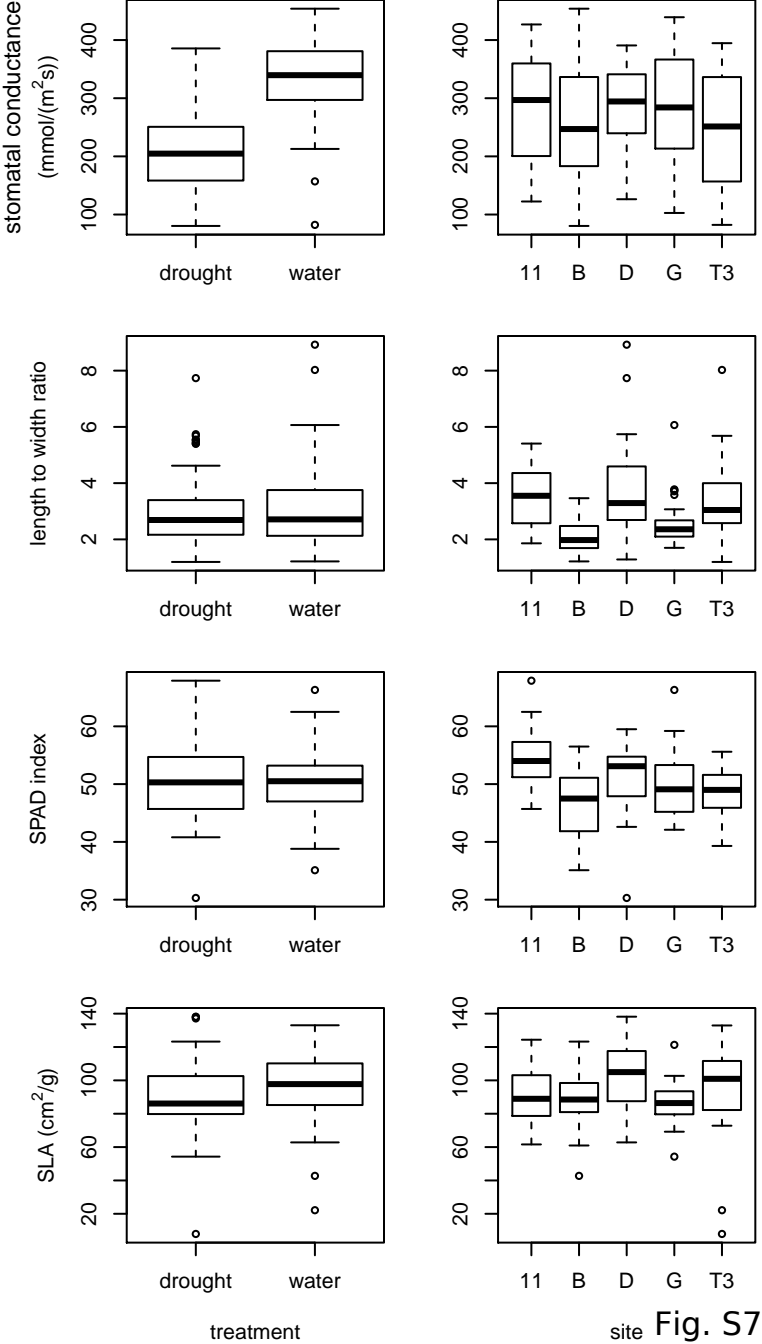

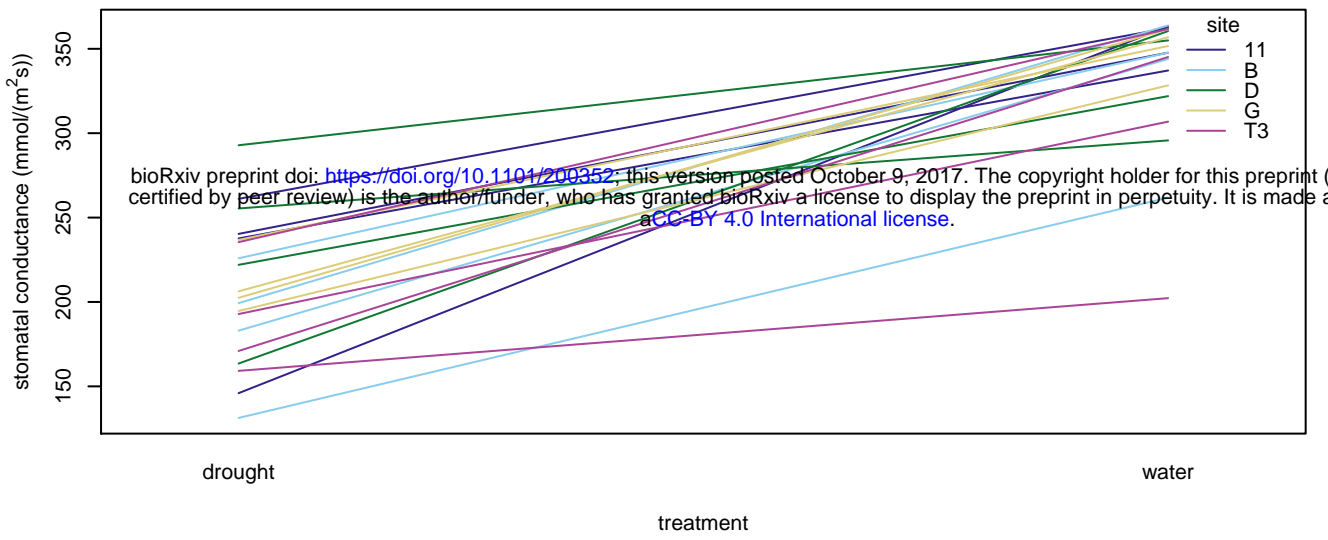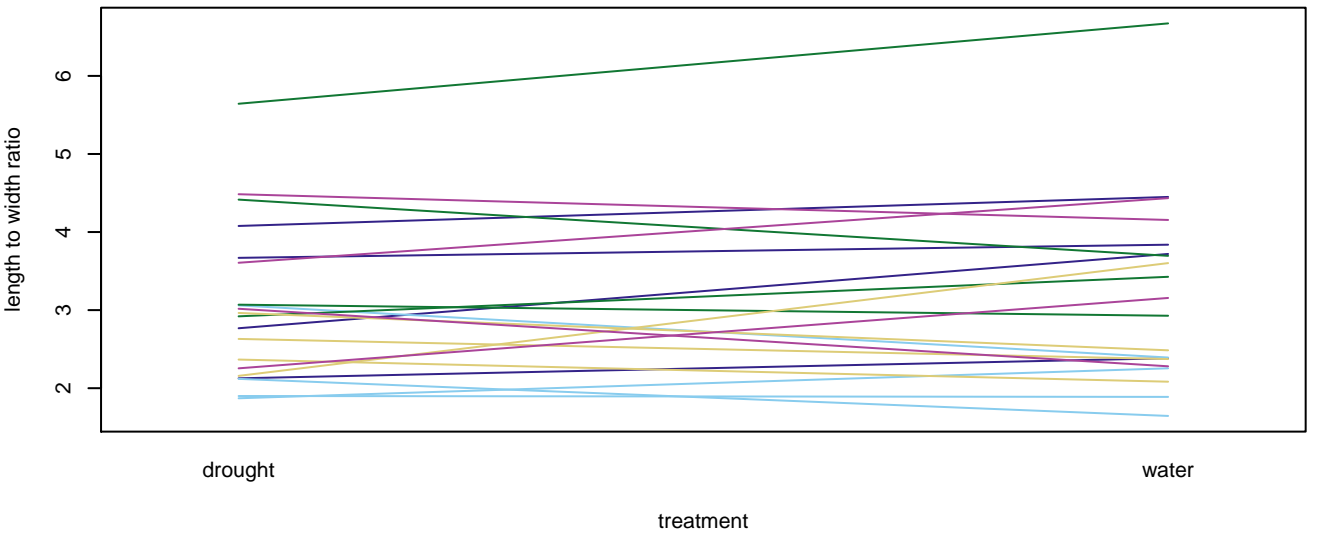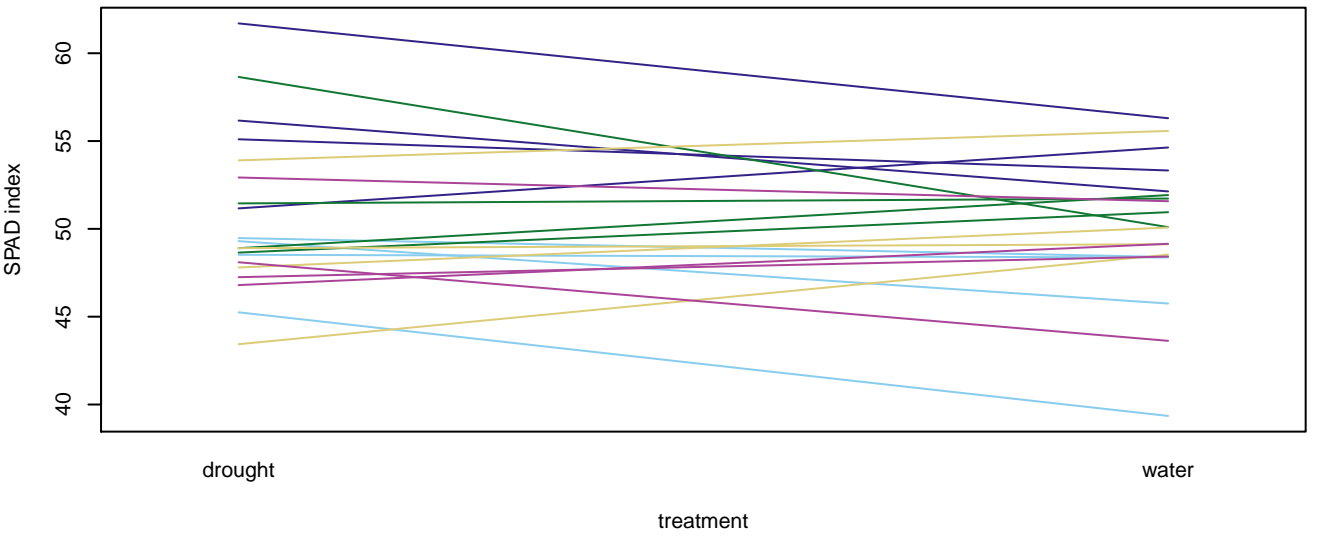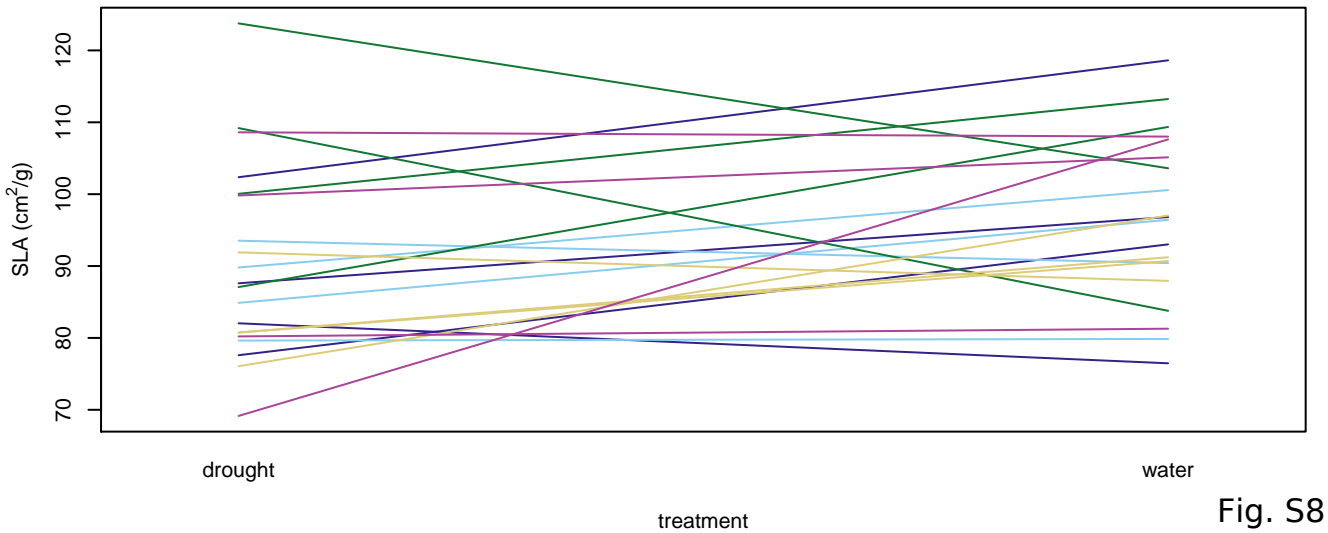

Fig. S8

10 cm

11 = ACT

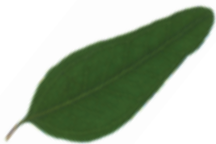

11-1-6

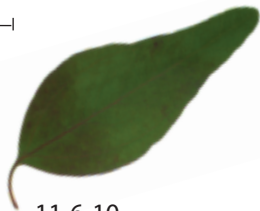

11-6-10

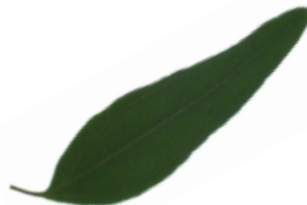

11-7-11

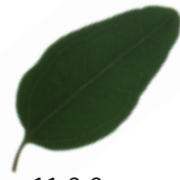

11-9-9

B = ACT

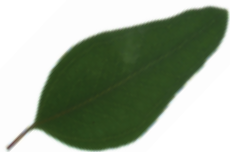

B-3-10

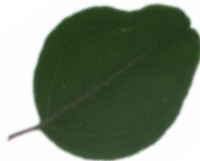

B-5-15

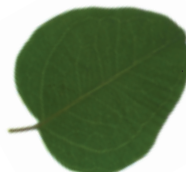

B-7-6

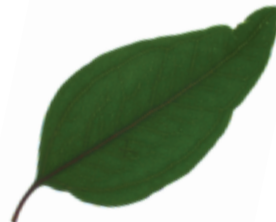

B-8-13

D = VIC

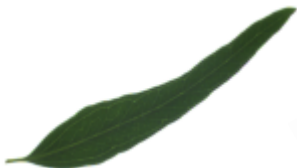

D-5-1

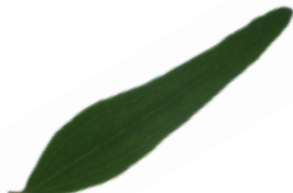

D-6-9

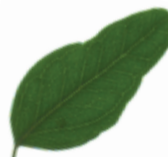

D-7-1

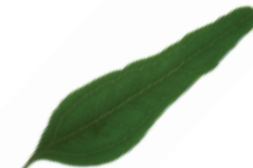

D-10-8

G = NSW

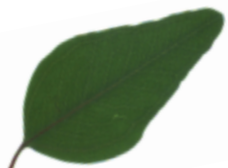

G-3-10

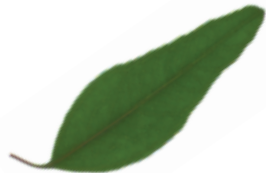

G-7-5

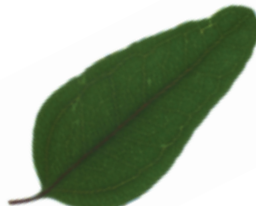

G-9-5

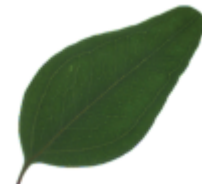

G-10-10

T3 = NSW

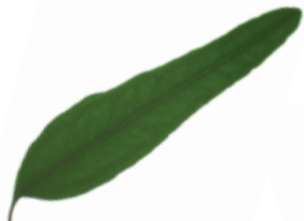

T3-3-9

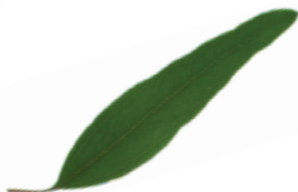

T3-7-11

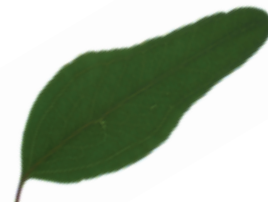

T3-8-1

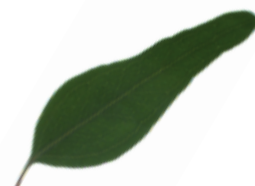

T3-9-7

Fig. S9

Table S1: *E. melliodora* sampling information

| site name | latitude   | longitude  | # sampled | # outliers*  | # in final analysis | chamber experiment | drought experiment |
|-----------|------------|------------|-----------|--------------|---------------------|--------------------|--------------------|
| 1         | -33.416668 | 149.55055  | 10        | 1 secondary  | 7                   |                    |                    |
| 2         | -36.6755   | 146.26477  | 10        |              | 7                   |                    |                    |
| 3         | -27.368696 | 152.03023  | 10        |              | 9                   |                    |                    |
| 5         | -33.710145 | 149.52355  | 10        | 1 primary    | 9                   |                    |                    |
| 7         | -33.936944 | 116.963333 | 7         | 7 geographic | 0                   |                    |                    |
| 10        | -37.285278 | 143.77778  | 10        |              | 8                   |                    |                    |
| 11        | -35.40026  | 149.1318   | 10        |              | 9                   | yes                | yes                |
| 13        | -36.997778 | 145.474944 | 6         |              | 3                   |                    |                    |
| 14        | -32.389167 | 150.881667 | 10        |              | 10                  |                    |                    |
| 16        | -33.224724 | 149.28056  | 7         | 3 secondary  | 2                   |                    |                    |
| 17        | -33.44218  | 147.51628  | 10        |              | 8                   |                    |                    |
| 19        | -37.179444 | 144.483333 | 10        |              | 9                   |                    |                    |
| 20        | -34.911785 | 148.971179 | 10        |              | 9                   |                    |                    |
| 21        | -37.144361 | 142.839428 | 10        |              | 9                   |                    |                    |
| 24        | -36.980278 | 144.047611 | 10        |              | 7                   |                    |                    |
| 26        | -35.39474  | 149.677129 | 10        | 7 primary    | 2                   |                    |                    |
| A         | -36.388    | 146.481    | 10        |              | 10                  |                    |                    |
| B         | -35.235664 | 149.16422  | 10        |              | 7                   | yes                | yes                |
| C         | -35.03333  | 147.33333  | 9         | 1 secondary  | 6                   |                    |                    |
| D         | -36.3675   | 145.70232  | 10        |              | 9                   | yes                | yes                |
| G         | -36.86476  | 148.85016  | 10        |              | 9                   | yes                | yes                |
| H         | -36.63518  | 149.56728  | 10        |              | 7                   |                    |                    |
| i1        | -36.75     | 145.583333 | 10        |              | 8                   |                    |                    |
| i2        | -36.54041  | 146.10739  | 10        |              | 7                   |                    |                    |
| J2        | -33.121143 | 149.05785  | 10        |              | 9                   |                    |                    |
| K2        | -30.54493  | 151.79367  | 10        |              | 8                   |                    |                    |
| M         | -34.630472 | 149.870892 | 3         | 1 primary    | 0                   |                    |                    |
| N1        | -34.036884 | 148.5675   | 10        |              | 10                  |                    |                    |
| N2        | -33.6166   | 149.64452  | 10        |              | 7                   |                    |                    |
| O         | -37.4279   | 147.8924   | 10        | 10 primary   | 10                  |                    |                    |
| P         | -35.819633 | 145.31187  | 10        |              | 9                   |                    |                    |
| T1        | -35.26495  | 147.310133 | 10        |              | 7                   | yes                |                    |
| T2        | -35.37515  | 147.25261  | 10        |              | 9                   |                    |                    |
| T3        | -35.299683 | 147.165733 | 10        |              | 10                  | yes                | yes                |
| U         | -36.632668 | 144.35019  | 10        |              | 8                   |                    |                    |
| V         | -33.423    | 149.752    | 10        |              | 7                   |                    |                    |
| W1        | -36.42797  | 144.41092  | 10        |              | 8                   |                    |                    |
| W2        | -36.580471 | 143.521639 | 10        |              | 4                   |                    |                    |
| W3        | -36.980278 | 144.047611 | 10        |              | 8                   |                    |                    |

\* primary outliers refers to outlier samples identified with the first PCA analysis

secondary outliers refers to outlier samples identified with the second PCA analysis

geographic refers to samples outside the natural distribution







Table S4: Percent of variation explained and p-values for non-interaction linear models for chamber experiment

|                             | seedling height |          | total leaf length |         | relative height increment |          |
|-----------------------------|-----------------|----------|-------------------|---------|---------------------------|----------|
|                             | % explained     | p-value  | % explained       | p-value | % explained               | p-value  |
| sampling site               | 17.7            | <0.00001 | 8.2               | 0.00063 | 1.8                       | <0.00001 |
| maternal line:sampling site | 10.6            | 0.00031  | 17.2              | 0.00001 | 27.6                      | <0.00001 |
| experimental condition      | 5.4             | 0.00032  | 1.2               | 0.05084 | 8.1                       | <0.00001 |
| germination chamber         | 0               | --       | 0.3               | --      | 0.8                       | --       |
| block                       | 1.1             | --       | 1.6               | --      | 5.1                       | --       |
| residual                    | 65.2            | --       | 71.5              | --      | 56.6                      | --       |

Table S5: P-values of interaction term in linear model for chamber experiment

|               | response variable |                   |                           |
|---------------|-------------------|-------------------|---------------------------|
|               | seedling height   | total leaf length | relative height increment |
| maternal line | 0.89              | 0.58              | 0.67                      |
| sampling site | 0.63              | 0.51              | 0.53                      |

Table S6: Percent of variation explained and p-values for non-interaction linear models for drought experiment

|                             | stomatal conductance |          | leaf length to width ratio |         | SPAD        |         | SLA         |         |
|-----------------------------|----------------------|----------|----------------------------|---------|-------------|---------|-------------|---------|
|                             | % explained          | p-value  | % explained                | p-value | % explained | p-value | % explained | p-value |
| sampling site               | 0.9                  | 0.02859  | 20                         | 0.00007 | 19.5        | 0.0001  | 6.7         | 0.00864 |
| maternal line:sampling site | 5.8                  | 0.00088  | 21.2                       | 0.00131 | 10.2        | 0.03344 | 7.9         | 0.07407 |
| experimental condition      | 62.3                 | <0.00001 | 0                          | 0.49232 | 0           | 0.54236 | 4.4         | 0.02135 |
| sample pairing              | 0                    | --       | 15.8                       | --      | 8.7         | --      | 4.9         | --      |
| block                       | 7.6                  | --       | 2.5                        | --      | 2.2         | --      | 6.1         | --      |
| residual                    | 23.4                 | --       | 40.5                       | --      | 59.4        | --      | 70          | --      |

Table S7: P-values of interaction term in linear model for drought experiment

|               | response variable    |                            |      |      |
|---------------|----------------------|----------------------------|------|------|
|               | stomatal conductance | leaf length to width ratio | SPAD | SLA  |
| maternal line | 0.13                 | 0.47                       | 0.56 | 0.27 |
| sampling site | 0.51                 | 0.78                       | 0.31 | 0.82 |
